# Supplementary material
Source: PubMed Central journal article supplement (PMC2822874)
Supplement: NIHMS79593-supplement-01.pdf [file NIHMS79593-supplement-01.pdf]

## Supplemental Data

### A Combinatorial Code for Pattern

#### Formation in *Drosophila* Oogenesis

Nir Yakoby, Christopher A. Bristow, Danielle Gong, Xenia Schafer, Jessica Lembong, Jeremiah J. Zartman, Marc S. Halfon, Trudi Schüpbach, and Stanislav Y. Shvartsman

#### Supplemental Experimental Procedures

##### RNA Extraction

Total RNA was extracted with the RNeasy kit (Qiagen) and RNA qualification was performed in a Gene Chip RNA 6000 Nano Assay (Agilent Technologies, Palo Alto, CA). RNA quantification was performed on 1  $\mu$ l total RNA sample in a NanoDrop ND-1000 spectrophotometer (NanoDrop Technologies, Wilmington, DE). Based on our estimates, this procedure yields 10-15  $\mu$ g of total RNA per replicate, which corresponds to 0.1-0.15  $\mu$ g/egg chamber. RNA samples were stored at -80°C.

##### Microarray Hybridization

The following backgrounds were used in microarray experiments: *CY2> $\lambda$ -top 4.2*, *CY2>dnEgfr*, *CY2>tkv\**, *CY2>Dad*, and *OreR* as a control. 3  $\mu$ g of total RNA was used in One Cycle Target Labeling for 1<sup>st</sup> and 2<sup>nd</sup> strand cDNA synthesis to obtain biotinylated labeled cRNA (Affymetrix GeneChip protocol, Santa Clara, CA). 20  $\mu$ g of fragmented cRNA from each sample was hybridized for 16 hr at 45°C to an Affymetrix *Drosophila* GeneChip 1 array. After hybridization, each array was stained with a streptavidin-phycoerythrin conjugate (Molecular Probes, Eugene, Oregon), washed and visualized with a Genearray™ Scanner (Agilent Technologies, Palo Alto, CA). Images were inspected visually for hybridization artifacts. In addition, quality assessment metrics were generated for each scanned image and evaluated based on empirical data from previous hybridizations and on the signal intensity of internal standards that were present in the hybridization cocktail.

Microarray data analysis was done using the probe sets from the *Drosophila* genome annotations v4.3 ([www.flybase.org](http://www.flybase.org)). Data analysis was performed on each of the genetic backgrounds compared to the wild type using the Golden Spike method [1]. The codes implementing the method compute eight sets of probe summaries for each of the arrays, and then normalize across the entire set of arrays using a Loess normalization [2]. For each probe set summary, the comparison of the genetic background to the wild type controls was performed using Cyber-T, an extension of a Student's t-test that assumes the standard deviation of the measurements is a function of signal intensity [3]. Finally, the probe summaries were combined and summarized as a single value and to account for the testing of multiple hypotheses, a false-discovery rate (q-value) is estimated using a permutation approach [1]. The final output is a fold-change and a q-value, which characterizes the significance of the observed change.

To generate a list of candidate targets of the EGFR and DPP in the follicle cells, we first set a threshold, based on the fold change and q-value. Next, we selected those genes that responded to perturbations of both pathways. The change in response to a pathway

perturbation implies that a transcript changed in abundance in response to either gain or loss-of-function perturbation. The number of potential targets depends on the values for the fold change and q-value (Figure S1). Using a fold-change cutoff of 1.75 and a q-value of 0.1, we obtained a list of 193 genes. Two genes from this list (*Vm32E*, *Dad*) have been previously shown to respond to both EGFR and BMP signaling [4, 5]. Three genes (*yellow-g2* [6], *CG4009* [7], *18w* [8]) were shown to be expressed in non-uniform spatial expression patterns. Finally, one gene (*Cp36*) was a previously validated target of EGFR [9].

### **Additional Filters and qRT-PCR Validation**

All targets from the generated list of genes were validated by qRT-PCR (using MX-3000P, Stratagene). 1 µg of each of the total RNA sample was used for first strand cDNA synthesis using TaqMan Reverse Transcription Kit (Roche, Branchburg, NJ) according to the manufacturer's protocol. For RT-PCR, the reaction consisted of calculated 25 ng first strand cDNA template, primer mix, ROX and SYBR Green PCR mix (Stratagene, La Jolla, CA), in a total volume of 25 µl, in 96-well plates. In most cases, PCR primers were designed to span an intron (except for genes with no introns), to generate a product amplicon at the size range of 90-120 bp. Primers that did not give any amplified product were redesigned one more time, and in most cases (80%) we were able to obtain the correct amplicon. A Beckman Coulter Biomek FX provided a high-throughput liquid handling system for the large-scale qRT-PCR screen.

The design of the qRT-PCR matches the array design with at least three biological replicates and a comparison of the mutant background to the wild type. A comparison of the fold changes for the two different methods shows a high correlation ( $R^2 = 0.87$ ; Figure S2, Tables S4 and S5).

For 39 genes we failed (after two attempts) to design primers that would amplify the gene from an OreR cDNA library, suggesting that these genes are not expressed in the wild type. These genes were excluded from the following analysis, which reduced the list of targets to 154 (Table S6). A significant number of genes showed coordinated response in all backgrounds (the direction of change, increase or decrease, was similar in all four backgrounds). This suggests that these changes might be due to stress, and/or induced by high levels of ectopic gene expression. To reduce false positive changes due to stress, as an additional filter, we tested whether the remaining 154 targets respond to overexpression of the GFP, driven by the same CY2-GAL4 driver. From 154 genes, 107 did not change in the CY2>GFP background and were included in the *in situ* hybridization step of our screen.

**Table S1. List of the Flybase Gene IDs, Gene Symbols, and Pattern Annotations from Literature and This Work**

|    | Flybase ID  | Symbol           | Stage 10A                         | Stage 10B                         | Stage 11                          | Stage 12                          | Source of information |
|----|-------------|------------------|-----------------------------------|-----------------------------------|-----------------------------------|-----------------------------------|-----------------------|
| 1  | FBgn0004364 | <i>l8w</i>       | A+U                               | $A \cup (D \setminus R)$          | $A \cup (D \setminus R)$          | $A \cup M$                        | 2006[8]*              |
| 2  | FBgn0004569 | <i>argos</i>     |                                   | $A \cap D$                        | M                                 | M                                 | 1997[10]*             |
| 3  | FBgn0023407 | <i>B4</i>        | A                                 |                                   |                                   |                                   | 2005[5]               |
| 4  | FBgn0001090 | <i>bnb</i>       |                                   |                                   |                                   | $A \cap D$                        | 2005[5]               |
| 5  | FBgn0000210 | <i>br</i>        | $U \setminus M$                   | $(A \setminus D) \cup R$          |                                   |                                   | 1997[11]*             |
| 6  | FBgn0024250 | <i>brk</i>       | $U \setminus A$                   | $U \setminus A$                   |                                   |                                   | 2006[12]*             |
| 7  | FBgn0031150 | <i>bves</i>      | $U \setminus D$                   | $U \setminus D$                   |                                   |                                   | 2007[13]              |
| 8  | FBgn0039709 | <i>Cad99C</i>    | U                                 | A                                 | $A \cup (D \setminus R)$          | $A \setminus D$                   | 2005[14]*             |
| 9  | FBgn0041342 | <i>Cct1</i>      | A                                 | A                                 |                                   | R                                 | 2003[15]              |
| 10 | FBgn0034709 | <i>CG3074</i>    | A                                 | $A \cup M$                        | F                                 | F                                 | 2004[6]               |
| 11 | FBgn0038469 | <i>CG4009</i>    |                                   | $D \setminus M$                   | $D \setminus M$                   | $D+U$                             | 2006[7]*              |
| 12 | FBgn0033631 | <i>CG9027</i>    |                                   |                                   |                                   | $A \cap D$                        | 2004[6]               |
| 13 | FBgn0032126 | <i>CG13113</i>   |                                   |                                   | F                                 |                                   | 2006[7]*              |
| 14 | FBgn0032120 | <i>CG33298</i>   |                                   | D                                 | D                                 | A                                 | 2005[5]               |
| 15 | FBgn0000359 | <i>Cp36</i>      |                                   |                                   | A+D                               | A+D                               | 1993[9]               |
| 16 | FBgn0020493 | <i>Dad</i>       | A                                 | A                                 |                                   |                                   | 2005[5]*              |
| 17 | FBgn0000490 | <i>dpp</i>       | A                                 | A                                 | A                                 | A                                 | 1996[16]              |
| 18 | FBgn0000568 | <i>Eip75B</i>    |                                   |                                   | D                                 |                                   | 1999[17]              |
| 19 | FBgn0004865 | <i>Eip78C</i>    |                                   |                                   |                                   | D                                 | 1999[18]              |
| 20 | FBgn0000575 | <i>emc</i>       | A                                 | A                                 | $A \cup R$                        | $A \cup R$                        | 2005[19]              |
| 21 | FBgn0010470 | <i>Fkbp13</i>    | A+U                               | $(A \cup D)+U$                    | $(A \cup D)+U$                    | $(A \cup D)+U$                    | 1999[18]*             |
| 22 | FBgn0011591 | <i>fnf</i>       | $U \setminus D$                   | $U \setminus D$                   |                                   |                                   | 2000[20]              |
| 23 | FBgn0001987 | <i>Gli</i>       |                                   |                                   | F                                 |                                   | 2005[5]               |
| 24 | FBgn0001257 | <i>ImpL2</i>     | A                                 | M                                 | $F \cup R$                        | F                                 | 2005[5]*              |
| 25 | FBgn0011225 | <i>jar</i>       | U                                 | A+U                               | F                                 | $F \cup R$                        | 1999[21]*             |
| 26 | FBgn0027339 | <i>jim-2</i>     | $U \setminus (A \cup D)$          | $U \setminus D$                   |                                   |                                   | 1999[22]              |
| 27 | FBgn0001297 | <i>kay-RB</i>    | U                                 |                                   | F                                 | $A \setminus D$                   | 2001[23]              |
| 28 | FBgn0015399 | <i>kekl</i>      | M                                 | M                                 | F                                 |                                   | 1997[10]*             |
| 29 | FBgn0020278 | <i>loco-c2</i>   | D                                 | D                                 | D                                 |                                   | 2001[24]              |
| 30 | FBgn0024211 | <i>mfas</i>      | $U \setminus D$                   |                                   |                                   |                                   | 2005[5]               |
| 31 | FBgn0014343 | <i>mirr</i>      | $A \cup D$                        | $A \cup R$                        | F                                 |                                   | 2000[20]*             |
| 32 | FBgn0002778 | <i>mnd</i>       |                                   | $A \cup (U \setminus D)$          |                                   |                                   | 2005[5]               |
| 33 | FBgn0003089 | <i>pip-RA</i>    | $A \cup (U \setminus D)$          | $U \setminus D$                   |                                   |                                   | 1998[25]*             |
| 34 | FBgn0003118 | <i>pnt-P1</i>    | $A \cup M$                        | $A \cup M$                        | F                                 |                                   | 1996[26]*             |
| 35 | FBgn0003118 | <i>pnt-P2</i>    | M                                 | R                                 | R                                 |                                   | 1996[26]*             |
| 36 | FBgn0243512 | <i>puc</i>       |                                   | A                                 | $A \cup D$                        |                                   | 2001[27]              |
| 37 | FBgn0004635 | <i>rho</i>       | $D \setminus M$                   | F                                 | F                                 |                                   | 1993[28]*             |
| 38 | FBgn0010851 | <i>sgl</i>       |                                   | F                                 | F                                 | M                                 | 2005[5]*              |
| 39 | FBgn0003388 | <i>shd</i>       |                                   | A                                 |                                   |                                   | 2003[29]              |
| 40 | FBgn0005638 | <i>slbo</i>      | A                                 | A                                 |                                   |                                   | 1992[30]              |
| 41 | FBgn0023423 | <i>slmb</i>      |                                   | F                                 | R                                 | R                                 | 2005[31]*             |
| 42 | FBgn0085450 | <i>Snoo</i>      | $(A \cap D) \cup (D \setminus D)$ | $D \setminus D$                   |                                   |                                   | 2007[32]*             |
| 43 | FBgn0003463 | <i>sog</i>       | $A \cap D$                        | $A \cap D$                        |                                   |                                   | 2000[33]*             |
| 44 | FBgn0014388 | <i>sty</i>       | M                                 | $A \cup M$                        | $(A \setminus D) \cup F$          |                                   | 1999[34]*             |
| 45 | FBgn0003716 | <i>tkv</i>       | $(A \setminus D) \cup R$          | $(A \setminus D) \cup R$          |                                   |                                   | 1999[35]*             |
| 46 | FBgn0014076 | <i>Vm32E</i>     | $U \setminus (A \cup D)$          | $U \setminus A$                   |                                   |                                   | 2000[36]              |
| 47 | FBgn0003984 | <i>vn</i>        |                                   | F                                 |                                   |                                   | 1998[37]              |
| 48 | FBgn0041709 | <i>yellow-g</i>  |                                   |                                   | $D \setminus R$                   |                                   | 2004[6]               |
| 49 | FBgn0035328 | <i>yellow-g2</i> |                                   | $A \setminus D$                   | $M \cup (U \setminus D)$          | $M \cup (U \setminus D)$          | 2004[6]*              |
| 50 | FBgn0011746 | <i>ana</i>       | $A \cap D$                        | $A \cap D$                        |                                   |                                   | this study            |
| 51 | FBgn0036715 | <i>Cad74A</i>    |                                   | $U \setminus R$                   | $U \setminus R$                   | $U \setminus R$                   | this study            |
| 52 | FBgn0039905 | <i>CG2052</i>    | $U \setminus D$                   | $U \setminus D$                   |                                   |                                   | this study            |
| 53 | FBgn0036612 | <i>CG4998</i>    | A                                 | $A \cup (D \setminus (M \cup R))$ | $A \cup (D \setminus (M \cup R))$ | $A \cup (D \setminus (M \cup R))$ | this study            |

|    |             |                               |                          |                                        |                          |                          |            |
|----|-------------|-------------------------------|--------------------------|----------------------------------------|--------------------------|--------------------------|------------|
| 54 | FBgn0029568 | <i>CG11381</i>                | $M \cup (U \setminus D)$ | $M \cup (U \setminus D)$               | $M \cup (U \setminus D)$ | $M \cup (U \setminus D)$ | this study |
| 55 | FBgn0039637 | <i>CG11880</i>                | A                        | A                                      |                          | $A \cup D$               | this study |
| 56 | FBgn0039695 | <i>CG12068</i>                | U                        | $(A \cup D) \setminus M$               | $A \cup (D \setminus F)$ | $(A \cup D) \setminus M$ | this study |
| 57 | FBgn0029966 | <i>CG15324</i>                |                          | $U \setminus M$                        | U                        | U                        | this study |
| 58 | FBgn0051522 | <i>CG31522</i>                | U                        | A+U                                    | A                        | A                        | this study |
| 59 | FBgn0051900 | <i>CG31900</i>                |                          |                                        | $A \cup (U \setminus D)$ | $A \cup (U \setminus D)$ | this study |
| 60 | FBgn0052774 | <i>CG32774</i>                |                          |                                        | $D \setminus R$          | $D \setminus R$          | this study |
| 61 | FBgn0053099 | <i>CG33099</i>                | U                        | $(A \setminus D) \cup (U \setminus A)$ |                          |                          | this study |
| 62 | FBgn0085446 | <i>CG34417</i>                | $U \setminus M$          | $(U \setminus M) + R$                  | $(U \setminus M) + R$    | R                        | this study |
| 63 | FBgn0000355 | <i>Cp15</i>                   | U                        | A+U                                    | U                        | U                        | this study |
| 64 | FBgn0000360 | <i>Cp38</i>                   |                          | $D \setminus M$                        | $(A+U) \setminus M$      | U                        | this study |
| 65 | FBgn0014465 | <i>Cp7Fb</i>                  | $A \cup D$               | $A \cup R$                             | $U \setminus F$          | $U \setminus R$          | this study |
| 66 | FBgn0014466 | <i>Cp7Fc</i>                  |                          | $(A \cup D) \setminus M$               | $(A+U) \setminus M$      | $(A+U) \setminus M$      | this study |
| 67 | FBgn0011577 | <i>dally</i>                  | A+U                      | A+U                                    | $A \setminus D$          |                          | this study |
| 68 | FBgn0004638 | <i>drk/Grb2</i>               | U                        | U                                      | M                        | M                        | this study |
| 69 | FBgn0034335 | <i>GstE1</i>                  | $U \setminus A$          | $U \setminus M$                        | R                        | F                        | this study |
| 70 | FBgn0001230 | <i>Hsp68</i>                  | A                        | A+U                                    |                          | $D \setminus R$          | this study |
| 71 | FBgn0023001 | <i>melt</i>                   |                          |                                        | D                        | $D \setminus M$          | this study |
| 72 | FBgn0014342 | <i>mia</i>                    |                          | $A \cap D$                             | A+U                      | A                        | this study |
| 73 | FBgn0011754 | <i>PhK<math>\gamma</math></i> | A                        | $A \setminus D$                        |                          |                          | this study |
| 74 | FBgn0003205 | <i>Ras85D</i>                 | D                        | F                                      | F                        | F                        | this study |
| 75 | FBgn0033033 | <i>scarface</i>               |                          | F                                      | F                        | F                        | this study |
| 76 | FBgn0015296 | <i>Shc</i>                    | U                        | F                                      | F                        | F                        | this study |
| 77 | FBgn0003507 | <i>srp</i>                    |                          |                                        | $D \setminus M$          | D                        | this study |
| 78 | FBgn0003865 | <i>tsg</i>                    |                          | $A \cap D$                             |                          |                          | this study |
| 79 | FBgn0004397 | <i>Vinc</i>                   |                          | F                                      | $F \cup R$               | $F \cup R$               | this study |
| 80 | FBgn0016075 | <i>vkg</i>                    |                          | A                                      | A                        | D                        | this study |
| 81 | FBgn0024179 | <i>wit</i>                    | A                        | $A \setminus D$                        |                          |                          | this study |

\*Denotes previously published patterns of genes that were repeated for this study.

**Table S2. Genes Arranged by the Number of Stages in which They Are Expressed**

| One stage (13)  | Two stages (23) | Three stages (26) | Four stages (19) |
|-----------------|-----------------|-------------------|------------------|
| <i>B4</i>       | <i>ana</i>      | <i>argos</i>      | <i>I8w</i>       |
| <i>bnb</i>      | <i>br</i>       | <i>Cad74A</i>     | <i>Cad99C</i>    |
| <i>CG9027</i>   | <i>brk</i>      | <i>Cct1</i>       | <i>CG3074</i>    |
| <i>CG13113</i>  | <i>bves</i>     | <i>CG4009</i>     | <i>CG4998</i>    |
| <i>Eip75B</i>   | <i>CG2052</i>   | <i>CG11880</i>    | <i>CG11381</i>   |
| <i>Eip78C</i>   | <i>CG31900</i>  | <i>CG15324</i>    | <i>CG12068</i>   |
| <i>Gli</i>      | <i>CG32774</i>  | <i>CG33298</i>    | <i>CG31522</i>   |
| <i>mfas</i>     | <i>CG33099</i>  | <i>Cp38</i>       | <i>CG34417</i>   |
| <i>mnd</i>      | <i>Cp36</i>     | <i>Cp7Fc</i>      | <i>Cp15</i>      |
| <i>shd</i>      | <i>Dad</i>      | <i>dally</i>      | <i>Cp7Fb</i>     |
| <i>vn</i>       | <i>fng</i>      | <i>Hsp68</i>      | <i>dpp</i>       |
| <i>yellow-g</i> | <i>jim-2</i>    | <i>kay-RB</i>     | <i>drk</i>       |
| <i>tsg</i>      | <i>melt</i>     | <i>kek1</i>       | <i>emc</i>       |
|                 | <i>PhKy</i>     | <i>loco-c2</i>    | <i>Fkbp13</i>    |
|                 | <i>pip-RA</i>   | <i>mia</i>        | <i>GstE1</i>     |
|                 | <i>puc</i>      | <i>mirr</i>       | <i>ImpL2</i>     |
|                 | <i>slbo</i>     | <i>pnt-P1</i>     | <i>jar</i>       |
|                 | <i>Snoo</i>     | <i>pnt-P2</i>     | <i>Ras85D</i>    |
|                 | <i>sog</i>      | <i>rho</i>        | <i>Shc</i>       |
|                 | <i>srp</i>      | <i>scarface</i>   |                  |
|                 | <i>tkv</i>      | <i>sgl</i>        |                  |
|                 | <i>Vm32E</i>    | <i>slmb</i>       |                  |
|                 | <i>wit</i>      | <i>sty</i>        |                  |
|                 |                 | <i>Vinc</i>       |                  |
|                 |                 | <i>vkg</i>        |                  |
|                 |                 | <i>yellow-g2</i>  |                  |

Corresponds to Figure 5B.

**Table S3. Lists of Genes Expressed in Stages 10A-12 of Oogenesis**

| Stage 10A(50)  | Stage S10B(66)   | Stage S11(52)    | Stage 12(45)     |
|----------------|------------------|------------------|------------------|
| <i>I8w</i>     | <i>I8w</i>       | <i>I8w</i>       | <i>I8w</i>       |
| <i>ana</i>     | <i>ana</i>       | <i>argos</i>     | <i>argos</i>     |
| <i>B4</i>      | <i>argos</i>     | <i>Cad74A</i>    | <i>bnb</i>       |
| <i>br</i>      | <i>br</i>        | <i>Cad99C</i>    | <i>Cad74A</i>    |
| <i>brk</i>     | <i>brk</i>       | <i>CG3074</i>    | <i>Cad99C</i>    |
| <i>bves</i>    | <i>bves</i>      | <i>CG4009</i>    | <i>Cct1</i>      |
| <i>Cad99C</i>  | <i>Cad74A</i>    | <i>CG4998</i>    | <i>CG11381</i>   |
| <i>Cct1</i>    | <i>Cad99C</i>    | <i>CG11381</i>   | <i>CG11880</i>   |
| <i>CG2052</i>  | <i>Cct1</i>      | <i>CG12068</i>   | <i>CG12068</i>   |
| <i>CG3074</i>  | <i>CG2052</i>    | <i>CG13113</i>   | <i>CG15324</i>   |
| <i>CG4998</i>  | <i>CG3074</i>    | <i>CG15324</i>   | <i>CG3074</i>    |
| <i>CG11381</i> | <i>CG4009</i>    | <i>CG31522</i>   | <i>CG31522</i>   |
| <i>CG11880</i> | <i>CG4998</i>    | <i>CG31900</i>   | <i>CG31900</i>   |
| <i>CG12068</i> | <i>CG11381</i>   | <i>CG32774</i>   | <i>CG32774</i>   |
| <i>CG31522</i> | <i>CG11880</i>   | <i>CG33298</i>   | <i>CG33298</i>   |
| <i>CG33099</i> | <i>CG12068</i>   | <i>CG34417</i>   | <i>CG34417</i>   |
| <i>CG34417</i> | <i>CG15324</i>   | <i>Cp15</i>      | <i>CG4009</i>    |
| <i>Cp15</i>    | <i>CG31522</i>   | <i>Cp36</i>      | <i>CG4998</i>    |
| <i>Cp7Fb</i>   | <i>CG33099</i>   | <i>Cp38</i>      | <i>CG9027</i>    |
| <i>Dad</i>     | <i>CG33298</i>   | <i>Cp7Fb</i>     | <i>Cp15</i>      |
| <i>dally</i>   | <i>CG34417</i>   | <i>Cp7Fc</i>     | <i>Cp36</i>      |
| <i>dpp</i>     | <i>Cp15</i>      | <i>dally</i>     | <i>Cp38</i>      |
| <i>drk</i>     | <i>Cp38</i>      | <i>dpp</i>       | <i>Cp7Fb</i>     |
| <i>emc</i>     | <i>Cp7Fb</i>     | <i>drk</i>       | <i>Cp7Fc</i>     |
| <i>Fkbp13</i>  | <i>Cp7Fc</i>     | <i>Eip75B</i>    | <i>dpp</i>       |
| <i>fng</i>     | <i>Dad</i>       | <i>emc</i>       | <i>drk</i>       |
| <i>GstE1</i>   | <i>dally</i>     | <i>Fkbp13</i>    | <i>Eip78C</i>    |
| <i>Hsp68</i>   | <i>dpp</i>       | <i>Gli</i>       | <i>emc</i>       |
| <i>ImpL2</i>   | <i>drk</i>       | <i>GstE1</i>     | <i>Fkbp13</i>    |
| <i>jar</i>     | <i>emc</i>       | <i>ImpL2</i>     | <i>GstE1</i>     |
| <i>jim-2</i>   | <i>Fkbp13</i>    | <i>jar</i>       | <i>Hsp68</i>     |
| <i>kay-RB</i>  | <i>fng</i>       | <i>kay-RB</i>    | <i>ImpL2</i>     |
| <i>kek1</i>    | <i>GstE1</i>     | <i>kek1</i>      | <i>jar</i>       |
| <i>loco-c2</i> | <i>Hsp68</i>     | <i>loco-c2</i>   | <i>kay-RB</i>    |
| <i>mfas</i>    | <i>ImpL2</i>     | <i>melt</i>      | <i>melt</i>      |
| <i>mirr</i>    | <i>jar</i>       | <i>mia</i>       | <i>mia</i>       |
| <i>PhKy</i>    | <i>jim-2</i>     | <i>mirr</i>      | <i>Ras85D</i>    |
| <i>pip-RA</i>  | <i>kek1</i>      | <i>pnt-P1</i>    | <i>scarface</i>  |
| <i>pnt-P1</i>  | <i>loco-c2</i>   | <i>pnt-P2</i>    | <i>sgl</i>       |
| <i>pnt-P2</i>  | <i>mia</i>       | <i>puc</i>       | <i>Shc</i>       |
| <i>Ras85D</i>  | <i>mirr</i>      | <i>Ras85D</i>    | <i>slmb</i>      |
| <i>rho</i>     | <i>mnd</i>       | <i>rho</i>       | <i>srp</i>       |
| <i>Shc</i>     | <i>PhKy</i>      | <i>scarface</i>  | <i>Vinc</i>      |
| <i>slbo</i>    | <i>pip-RA</i>    | <i>sgl</i>       | <i>vkg</i>       |
| <i>Snoo</i>    | <i>pnt-P1</i>    | <i>Shc</i>       | <i>yellow-g2</i> |
| <i>sog</i>     | <i>pnt-P2</i>    | <i>slmb</i>      |                  |
| <i>sty</i>     | <i>puc</i>       | <i>srp</i>       |                  |
| <i>tkv</i>     | <i>Ras85D</i>    | <i>sty</i>       |                  |
| <i>Vm32E</i>   | <i>rho</i>       | <i>Vinc</i>      |                  |
| <i>wit</i>     | <i>scarface</i>  | <i>vkg</i>       |                  |
|                | <i>sgl</i>       | <i>yellow-g</i>  |                  |
|                | <i>Shc</i>       | <i>yellow-g2</i> |                  |
|                | <i>shd</i>       |                  |                  |
|                | <i>slbo</i>      |                  |                  |
|                | <i>slmb</i>      |                  |                  |
|                | <i>Snoo</i>      |                  |                  |
|                | <i>sog</i>       |                  |                  |
|                | <i>sty</i>       |                  |                  |
|                | <i>tkv</i>       |                  |                  |
|                | <i>tsg</i>       |                  |                  |
|                | <i>Vinc</i>      |                  |                  |
|                | <i>vkg</i>       |                  |                  |
|                | <i>Vm32E</i>     |                  |                  |
|                | <i>vn</i>        |                  |                  |
|                | <i>wit</i>       |                  |                  |
|                | <i>yellow-g2</i> |                  |                  |

Corresponds to Figure 5B.

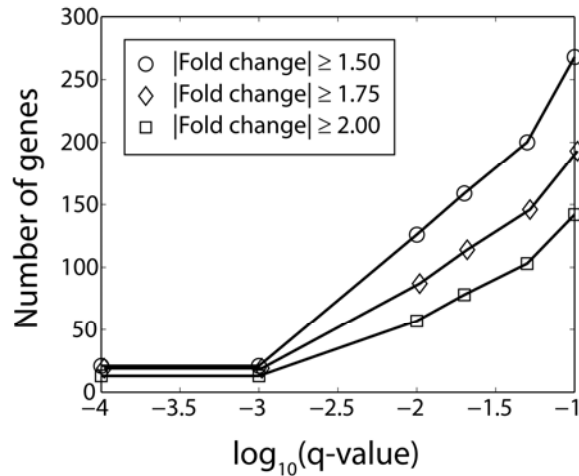

**Figure S1. The Number of Candidate Genes as a Function of Statistical Filter Parameters**

See Experimental Procedures for more details.

The filter first sets a fold change and q-value threshold for each of the four genetic backgrounds (*CY2>caTKV*, *CY2>Dad*, *CY2>caEGFR*, *CY2>dnEGFR* compared to OreR). If a least one background per pathway is activated or repressed, the gene is considered a candidate for future investigation. The number of targets for a range of options is shown. A q-value = 0.1 and an absolute fold change = 1.75 was selected, resulting in 193 candidate genes.

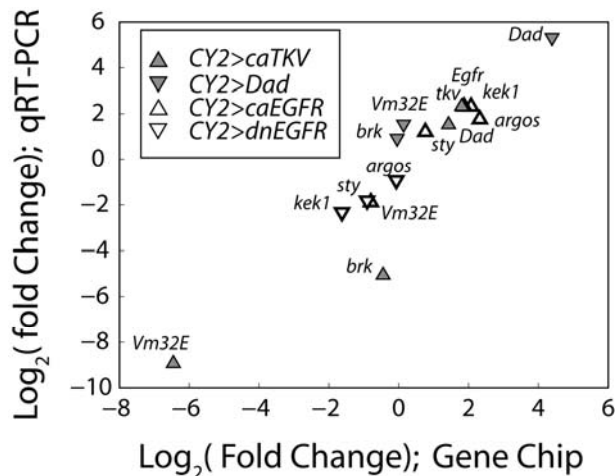

**Figure S2. Comparison of qRT-PCR and Affymetrix Gene Chip Fold Changes**

The mRNA abundance measurements in the four used pathway perturbations compared to wild type using both qRT-PCR and Affymetrix Gene Chip assays. There is a linear correlation with a slope of 1.3 and Pearson correlation coefficient equal to 0.87.

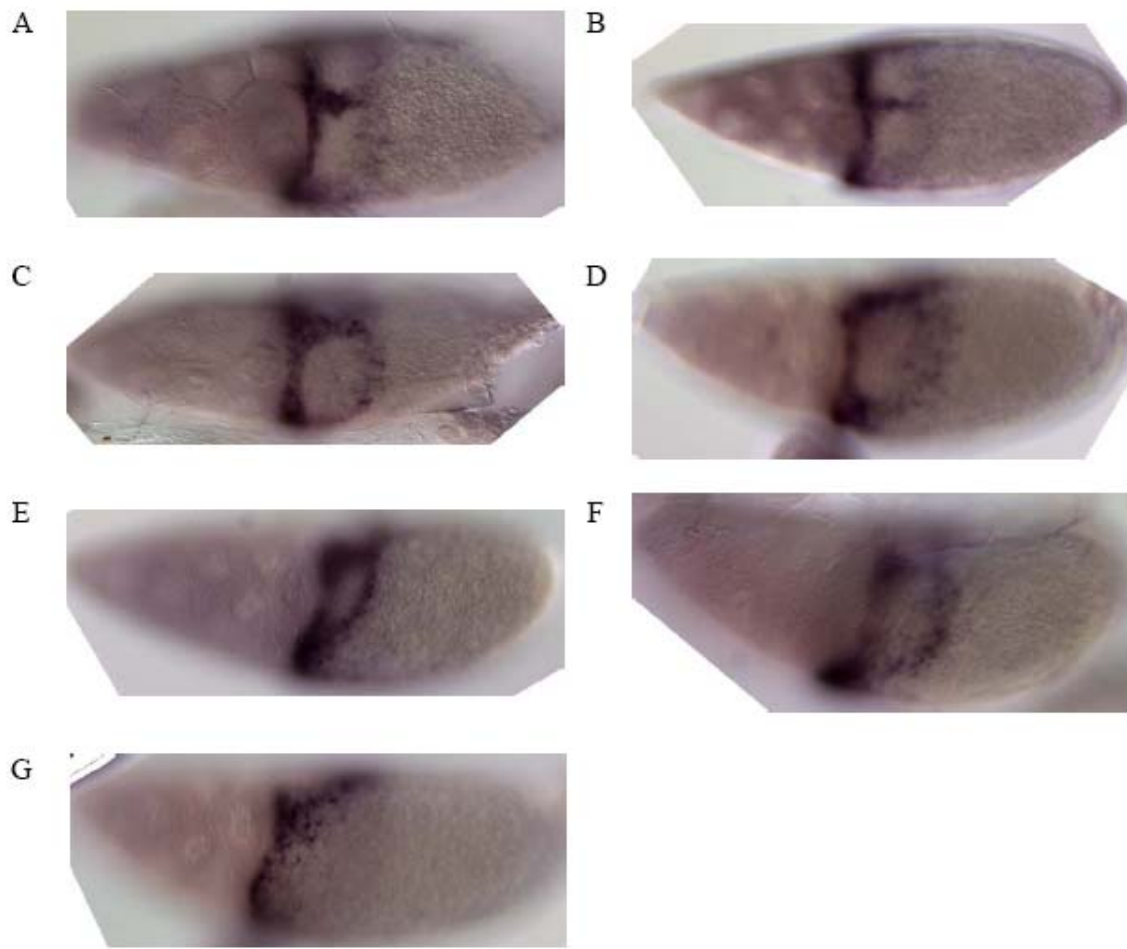

**Figure S3. Examples of Images of the Wild-Type Expression Pattern of 18w**  
Images are collected from egg chambers in different stages of development and dorsoventral orientations on the microscope slide. Note how the egg chamber in (F, with the lateral view of expression pattern) is deformed as a result of its connection to other egg chamber within the ovariole.



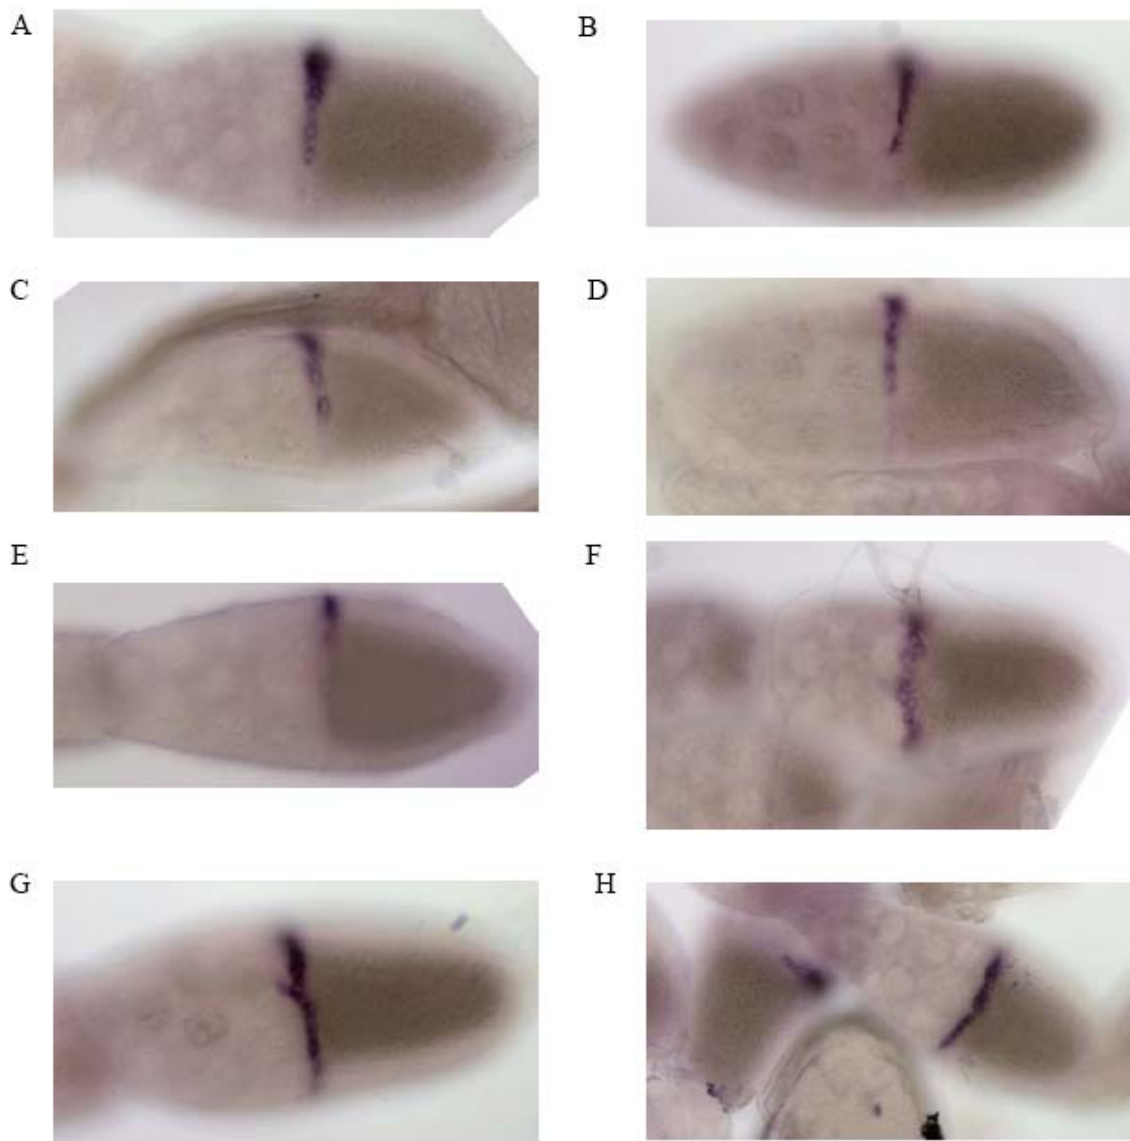

**Figure S4. Examples of Images of the Wild-Type Expression Pattern of ana**  
Images F and H show that useful information about the expression pattern can be extracted from images collected from clusters of connected egg chambers, a situation that presents a major challenge for a purely computational approach.

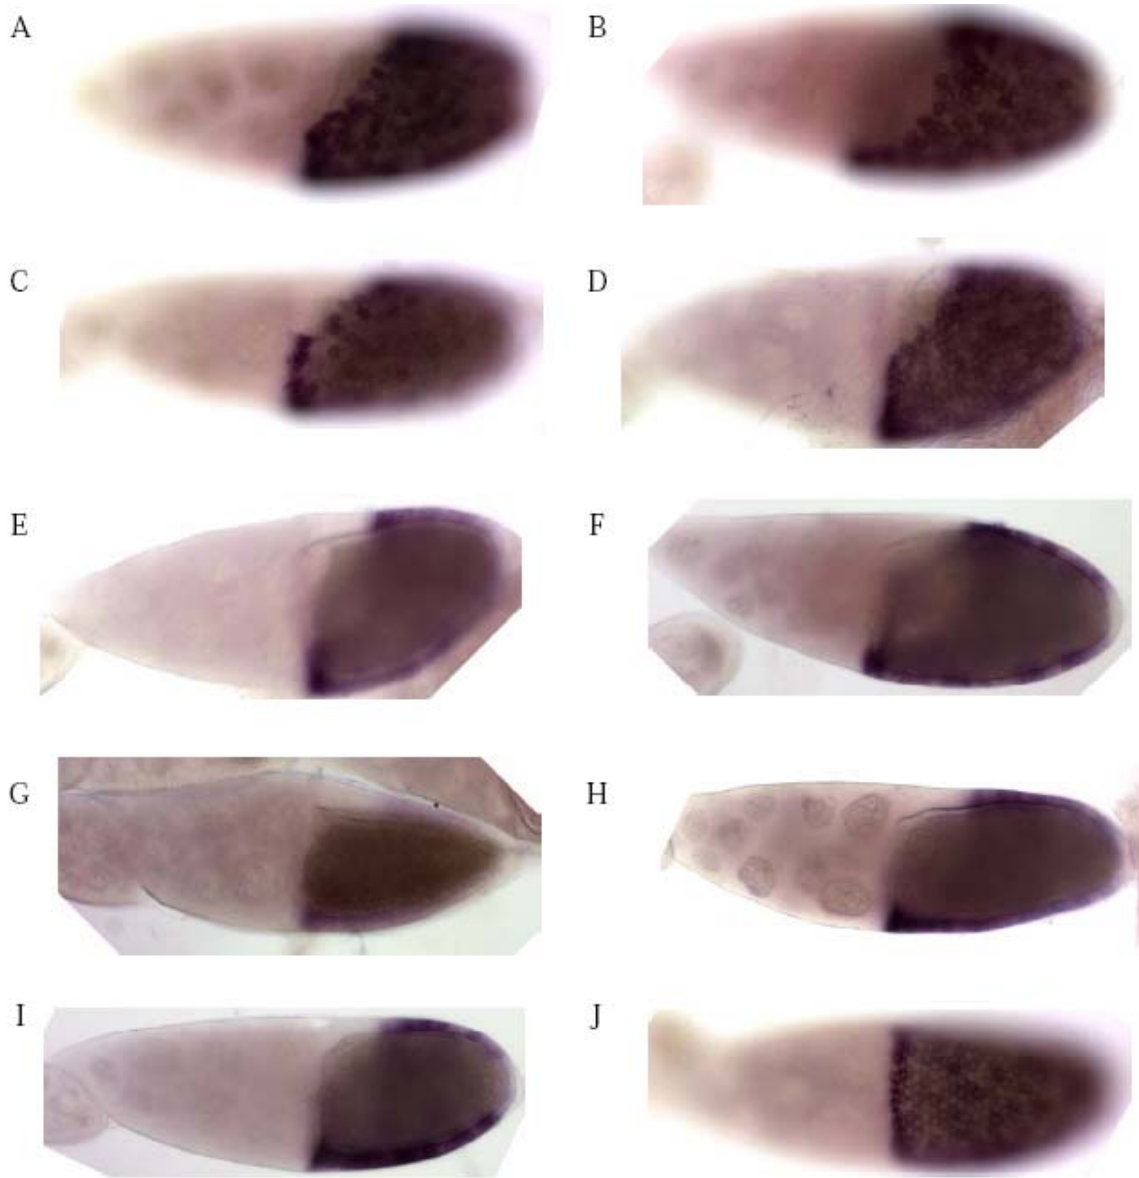

**Figure S5. Examples of Images Collected for the Wild-Type Expression Pattern of CG2025**

As in Figures S3 and S4, images are collected from egg chambers in different orientations and different locations of the focal plane.

**Table S4. qRT-PCR Data for Method Validation and Platform Comparison**

| Gene         | Genetic Background   | Fold Change (log 2) | P-value  |
|--------------|----------------------|---------------------|----------|
| <i>Egfr</i>  | <i>CY2&gt;caEGFR</i> | 2.33                | 1.39E-05 |
| <i>argos</i> | <i>CY2&gt;caEGFR</i> | 3.40                | 1.56E-06 |
| <i>kek1</i>  | <i>CY2&gt;caEGFR</i> | 5.01                | 2.92E-03 |
| <i>sty</i>   | <i>CY2&gt;caEGFR</i> | 2.32                | 1.35E-02 |
| <i>Vm32E</i> | <i>CY2&gt;caEGFR</i> | -1.89               | 2.00E-04 |
| <i>argos</i> | <i>CY2&gt;dnEGFR</i> | -0.93               | 4.81E-02 |
| <i>kek1</i>  | <i>CY2&gt;dnEGFR</i> | -2.33               | 1.38E-03 |
| <i>sty</i>   | <i>CY2&gt;dnEGFR</i> | -1.82               | 9.74E-03 |
| <i>Dad</i>   | <i>CY2&gt;Dad</i>    | 5.32                | 1.59E-07 |
| <i>brk</i>   | <i>CY2&gt;Dad</i>    | 0.93                | 4.97E-02 |
| <i>Vm32E</i> | <i>CY2&gt;Dad</i>    | 1.55                | 5.31E-02 |
| <i>tkv</i>   | <i>CY2&gt;caTKV</i>  | 2.33                | 2.17E-05 |
| <i>brk</i>   | <i>CY2&gt;caTKV</i>  | -5.06               | 1.00E-04 |
| <i>Dad</i>   | <i>CY2&gt;caTKV</i>  | 1.53                | 8.58E-04 |
| <i>Vm32E</i> | <i>CY2&gt;caTKV</i>  | -8.94               | 3.75E-07 |

The fold change was calculated using the Delta-delta Ct method and p-value is based on a student t-test (n = 3).

**Table S5. Affymetrix GeneChip Data for Method Validation and Platform Comparison**

| Gene sym     | Affyprobe ID | Genetic Background   | Fold Change (log 2) | q-value  |
|--------------|--------------|----------------------|---------------------|----------|
| <i>Egfr</i>  | 142966_at    | <i>CY2&gt;caEGFR</i> | 1.87                | 2.81E-03 |
| <i>argos</i> | 143483_at    | <i>CY2&gt;caEGFR</i> | 2.32                | 5.57E-02 |
| <i>kek1</i>  | 141473_at    | <i>CY2&gt;caEGFR</i> | 2.08                | 2.34E-03 |
| <i>sty</i>   | 143757_at    | <i>CY2&gt;caEGFR</i> | 0.76                | 3.78E-02 |
| <i>Vm32E</i> | 143749_at    | <i>CY2&gt;caEGFR</i> | -0.84               | 0.00E+00 |
| <i>argos</i> | 143483_at    | <i>CY2&gt;dnEGFR</i> | -0.07               | 9.92E-01 |
| <i>kek1</i>  | 141473_at    | <i>CY2&gt;dnEGFR</i> | -1.62               | 6.83E-02 |
| <i>sty</i>   | 143757_at    | <i>CY2&gt;dnEGFR</i> | -0.86               | 2.43E-01 |
| <i>Dad</i>   | 152910_at    | <i>CY2&gt;Dad</i>    | 4.39                | 0.00E+00 |
| <i>brk</i>   | 141498_at    | <i>CY2&gt;Dad</i>    | -0.05               | 9.04E-01 |
| <i>Vm32E</i> | 143749_at    | <i>CY2&gt;Dad</i>    | 0.14                | 1.90E-01 |
| <i>tkv</i>   | 143377_at    | <i>CY2&gt;caTKV</i>  | 1.81                | 0.00E+00 |
| <i>brk</i>   | 141498_at    | <i>CY2&gt;caTKV</i>  | -0.45               | 7.57E-02 |
| <i>Dad</i>   | 152910_at    | <i>CY2&gt;caTKV</i>  | 1.43                | 2.55E-02 |
| <i>Vm32E</i> | 143749_at    | <i>CY2&gt;caTKV</i>  | -6.45               | 0.00E+00 |

The fold change values are calculated using the Golden Spike script.

**Table S6. qRT-PCR Transcriptional Profiling of Stage 9-10 Egg Chambers in which the UAS-GFP Was Expressed using the CY2-Gal4 Driver**

| Affyprobe ID | CG id   | FBgn ID     | Fold change (log2) | P-value  |
|--------------|---------|-------------|--------------------|----------|
| 148885_at    | CG4998  | FBgn0036612 | -1.34              | 5.93E-02 |
| 150043_at    | CG4009  | FBgn0038469 | -1.32              | 5.58E-02 |
| 144376_at    | CG11381 | FBgn0029568 | -1.08              | 7.47E-02 |
| 142610_at    | CG17270 | FBgn0038828 | -1.07              | 5.99E-02 |
| 142851_at    | CG8891  | FBgn0031663 | -0.99              | 1.29E-02 |
| 147662_at    | CG11275 | FBgn0034706 | -0.95              | 2.40E-04 |
| 146008_at    | CG31900 | FBgn0051900 | -0.94              | 1.00E-01 |
| 153734_at    | CG7137  | FBgn0034422 | -0.90              | 1.10E-01 |
| 151850_at    | CG3960  | FBgn0029876 | -0.88              | 5.48E-02 |
| 153930_at    | CG5224  | FBgn0034354 | -0.81              | 1.68E-01 |
| 147990_at    | CG13926 | FBgn0035243 | -0.78              | 2.68E-03 |
| 149494_at    | CG7352  | FBgn0037581 | -0.78              | 1.48E-03 |
| 145026_at    | CG11158 | FBgn0030511 | -0.76              | 1.87E-01 |
| 152113_at    | CG8084  | FBgn0011746 | -0.75              | 1.39E-01 |
| 142726_at    | CG10390 | FBgn0037337 | -0.73              | 5.52E-03 |
| 144023_at    | CG8357  | FBgn0024732 | -0.67              | 3.13E-02 |
| 151192_at    | CG15386 | FBgn0040715 | -0.63              | 3.15E-02 |
| 146217_at    | CG16834 | FBgn0040096 | -0.58              | 2.34E-02 |
| 144705_at    | CG15351 | FBgn0030045 | -0.55              | 3.52E-01 |
| 142672_at    | CG10157 | FBgn0039099 | -0.48              | 2.63E-02 |
| 142350_at    | CG8063  | FBgn0038105 | -0.45              | 2.41E-01 |
| 152281_at    | CG3654  | FBgn0036004 | -0.44              | 3.63E-01 |
| 142446_at    | CG13344 | FBgn0033884 | -0.44              | 5.24E-02 |
| 146264_s_at  | CG31864 | FBgn0051864 | -0.42              | 5.33E-02 |
| 141687_at    | CG3992  | FBgn0003507 | -0.41              | 4.13E-01 |
| 146878_at    | CG8799  | FBgn0010549 | -0.39              | 8.02E-02 |
| 150058_at    | CG5285  | FBgn0038490 | -0.39              | 7.83E-02 |
| 144704_at    | CG15350 | FBgn0030044 | -0.30              | 4.84E-01 |
| 152907_at    | CG8896  | FBgn0004364 | -0.27              | 8.95E-02 |
| 148945_at    | CG6445  | FBgn0036715 | -0.26              | 6.29E-01 |
| 151838_at    | CG2789  | FBgn0031263 | -0.26              | 2.78E-01 |
| 150837_at    | CG7592  | FBgn0039685 | -0.25              | 7.16E-01 |
| 143790_at    | CG2849  | FBgn0015286 | -0.22              | 7.05E-02 |
| 145488_at    | CG17600 | FBgn0031195 | -0.17              | 3.33E-01 |
| 142117_at    | CG9754  | FBgn0034617 | -0.15              | 5.24E-01 |
| 146832_at    | CG14745 | FBgn0043575 | -0.15              | 8.21E-01 |
| 144058_at    | CG14796 | FBgn0025390 | -0.14              | 8.48E-01 |
| 151591_at    | CG3606  | FBgn0011571 | -0.13              | 3.37E-01 |
| 144406_at    | CG13758 | FBgn0040378 | -0.13              | 5.53E-01 |
| 151208_at    | CG15068 | FBgn0040733 | -0.13              | 8.57E-01 |
| 143459_at    | CG3299  | FBgn0004397 | -0.08              | 6.69E-01 |
| 152598_at    | CG5164  | FBgn0034335 | -0.06              | 8.46E-01 |
| 150110_at    | CG31243 | FBgn0000363 | -0.02              | 7.16E-01 |
| 147507_s_at  | CG18367 | FBgn0034460 | -0.01              | 9.85E-01 |
| 148775_at    | CG10006 | FBgn0036461 | -0.01              | 9.72E-01 |
| 143472_at    | CG5723  | FBgn0004449 | 0.01               | 9.83E-01 |
| 142587_at    | CG33099 | FBgn0053099 | 0.03               | 9.05E-01 |
| 143601_at    | CG17603 | FBgn0010355 | 0.03               | 9.18E-01 |
| 142181_at    | CG30079 | FBgn0050079 | 0.05               | 9.06E-01 |
| 141361_at    | CG11880 | FBgn0039637 | 0.05               | 8.47E-01 |
| 145269_at    | CG6835  | FBgn0030882 | 0.05               | 7.33E-01 |
| 152132_at    | CG14956 | FBgn0035403 | 0.07               | 7.25E-01 |
| 143934_at    | CG8085  | FBgn0020620 | 0.07               | 2.13E-01 |
| 152313_at    | CG10241 | FBgn0015714 | 0.07               | 6.27E-01 |
| 145610_at    | CG15356 | FBgn0031377 | 0.09               | 8.82E-01 |
| 149053_at    | CG9451  | FBgn0036876 | 0.09               | 7.19E-01 |
| 143317_at    | CG9375  | FBgn0003205 | 0.09               | 4.91E-01 |
| 146696_at    | CG18584 | FBgn0033107 | 0.11               | 6.48E-01 |

|             |         |             |       |          |
|-------------|---------|-------------|-------|----------|
| 143969_at   | CG8624  | FBgn0023001 | 0.12  | 7.10E-01 |
| 150844_at   | CG12068 | FBgn0039695 | 0.20  | 6.50E-01 |
| 154786_at   | CG18522 | FBgn0038347 | 0.21  | 4.17E-01 |
| 144998_at   | CG15745 | FBgn0030469 | 0.22  | 5.35E-01 |
| 152050_at   | CG10512 | FBgn0037057 | 0.24  | 1.76E-01 |
| 146672_at   | CG1765  | FBgn0000546 | 0.27  | 2.99E-01 |
| 145366_at   | CG12199 | FBgn0031016 | 0.28  | 1.92E-01 |
| 152573_at   | CG32919 | FBgn0052919 | 0.34  | 3.46E-01 |
| 151626_at   | CG31522 | FBgn0051522 | 0.35  | 6.39E-02 |
| 146369_at   | CG5996  | FBgn0032593 | 0.36  | 1.17E-01 |
| 152071_at   | CG2052  | FBgn0039905 | 0.41  | 5.95E-02 |
| 150265_at   | CG10877 | FBgn0038804 | 0.41  | 1.09E-01 |
| 145126_at   | CG33206 | FBgn0052587 | 0.42  | 1.90E-01 |
| 146651_at   | CG11066 | FBgn0033033 | 0.43  | 1.01E-01 |
| 151528_at   | CG3665  | FBgn0000635 | 0.45  | 3.48E-01 |
| 145426_at   | CG15457 | FBgn0031111 | 0.46  | 2.45E-01 |
| 145397_at   | CG12701 | FBgn0031071 | 0.49  | 1.36E-03 |
| 150459_at   | CG31145 | FBgn0051145 | 0.49  | 2.44E-01 |
| 150538_at   | CG10845 | FBgn0039246 | 0.50  | 5.40E-01 |
| 148087_at   | CG14957 | FBgn0035412 | 0.51  | 1.51E-01 |
| 150834_at   | CG7584  | FBgn0039682 | 0.51  | 2.99E-01 |
| 152162_at   | CG5888  | FBgn0028523 | 0.53  | 4.68E-01 |
| 150337_at   | CG6560  | FBgn0038916 | 0.53  | 5.58E-01 |
| 147986_at   | CG12099 | FBgn0035232 | 0.57  | 9.12E-03 |
| 146648_at   | CG8245  | FBgn0033031 | 0.62  | 2.30E-03 |
| 145000_at   | CG1630  | FBgn0030471 | 0.64  | 5.03E-02 |
| 143105_at   | CG1618  | FBgn0000346 | 0.64  | 3.02E-02 |
| 144660_at   | CG15324 | FBgn0029966 | 0.66  | 9.58E-03 |
| 154208_at   | CG16721 | FBgn0029820 | 0.67  | 1.20E-03 |
| 146317_at   | CG15481 | FBgn0032487 | 0.67  | 3.42E-03 |
| 143082_at   | CG10422 | FBgn0000158 | 0.67  | 2.12E-02 |
| 141646_at   | CG17544 | FBgn0032775 | 0.71  | 4.78E-02 |
| 144233_at   | CG15281 | FBgn0028536 | 0.72  | 2.98E-01 |
| 148687_at   | CG11263 | FBgn0036330 | 0.72  | 3.44E-04 |
| 153098_at   | CG16705 | FBgn0039102 | 0.72  | 1.43E-01 |
| 144007_at   | CG10564 | FBgn0024150 | 0.76  | 1.81E-02 |
| 143749_at   | CG16874 | FBgn0014076 | 0.82  | 2.84E-02 |
| 146913_at   | CG1418  | FBgn0033468 | 0.83  | 1.36E-03 |
| 143112_at   | CG11213 | FBgn0000360 | 0.84  | 7.95E-04 |
| 153620_at   | CG12342 | FBgn0033552 | 0.85  | 1.48E-02 |
| 150996_at   | CG11093 | FBgn0039932 | 0.89  | 9.14E-03 |
| 153182_at   | CG17604 | FBgn0000246 | 0.89  | 2.40E-02 |
| 148035_at   | CG13804 | FBgn0035328 | 0.92  | 6.97E-02 |
| 152094_at   | CG17035 | FBgn0036545 | 0.95  | 6.77E-04 |
| 143107_at   | CG6519  | FBgn0000355 | 1.28  | 5.57E-02 |
| 146607_at   | CG6691  | FBgn0032971 | 1.31  | 1.67E-01 |
| 148868_at   | CG13046 | FBgn0036595 | 2.39  | 5.44E-02 |
| 151558_r_at | CG32737 | FBgn0052737 | -9.42 | 5.04E-07 |
| 147434_at   | CG17522 | FBgn0034334 | -7.38 | 2.19E-02 |
| 142324_at   | CG10618 | FBgn0045761 | -5.79 | 1.31E-07 |
| 146297_at   | CG6167  | FBgn0032447 | -5.04 | 1.75E-05 |
| 152499_at   | CG33008 | FBgn0053008 | -4.97 | 1.00E-04 |
| 152408_at   | CG31714 | FBgn0032180 | -4.42 | 9.03E-04 |
| 153539_at   | CG10287 | FBgn0026077 | -3.81 | 5.58E-03 |
| 142222_at   | CG4486  | FBgn0015039 | -3.63 | 1.93E-05 |
| 149400_at   | CG10284 | FBgn0037441 | -3.62 | 4.52E-03 |
| 147309_at   | CG4398  | FBgn0034126 | -2.99 | 3.64E-05 |
| 144340_at   | CG13375 | FBgn0040370 | -2.92 | 2.71E-06 |
| 143827_at   | CG3801  | FBgn0015586 | -2.75 | 2.58E-02 |
| 144378_at   | CG11382 | FBgn0040367 | -2.68 | 2.83E-06 |
| 141780_at   | CG3616  | FBgn0015040 | -2.49 | 4.19E-06 |

|           |         |             |       |          |
|-----------|---------|-------------|-------|----------|
| 153744_at | CG9650  | FBgn0029939 | -2.36 | 6.23E-04 |
| 142479_at | CG17533 | FBgn0034342 | -2.07 | 1.02E-04 |
| 149762_at | CG4421  | FBgn0010044 | -1.88 | 2.10E-02 |
| 143971_at | CG2457  | FBgn0023077 | -1.78 | 1.38E-03 |
| 143303_at | CG11205 | FBgn0003082 | -1.46 | 1.24E-02 |
| 143890_at | CG2187  | FBgn0017448 | -1.39 | 1.03E-02 |
| 143723_at | CG10246 | FBgn0013771 | -1.34 | 8.10E-03 |
| 144073_at | CG12467 | FBgn0025623 | -1.16 | 6.98E-04 |
| 142248_at | CG4604  | FBgn0033799 | -1.13 | 9.86E-03 |
| 143111_at | CG1478  | FBgn0000359 | -1.12 | 3.89E-02 |
| 153777_at | CG3027  | FBgn0037513 | -1.07 | 7.48E-03 |
| 142801_at | CG3217  | FBgn0025676 | -1.02 | 1.94E-03 |
| 143299_at | CG17725 | FBgn0003067 | 1.26  | 6.76E-03 |
| 154778_at | CG1275  | FBgn0035321 | 1.34  | 3.72E-03 |
| 145061_at | CG32602 | FBgn0052602 | 1.37  | 4.62E-02 |
| 149966_at | CG5302  | FBgn0038351 | 1.44  | 7.38E-03 |
| 144357_at | CG3711  | FBgn0040344 | 1.54  | 5.90E-03 |
| 143868_at | CG16858 | FBgn0016075 | 1.83  | 4.25E-02 |
| 151211_at | CG16844 | FBgn0040736 | 1.91  | 2.50E-03 |
| 143197_at | CG5436  | FBgn0001230 | 2.16  | 2.27E-02 |
| 149757_at | CG4381  | FBgn0010039 | 2.27  | 1.30E-02 |
| 149854_at | CG14367 | FBgn0038170 | 2.36  | 2.45E-05 |
| 148799_at | CG12327 | FBgn0036492 | 2.94  | 2.40E-02 |
| 149756_at | CG4181  | FBgn0010038 | 2.94  | 6.13E-05 |
| 151957_at | CG7985  | FBgn0028499 | 2.96  | 4.60E-04 |
| 146288_at | CG6417  | FBgn0032435 | 3.00  | 1.60E-03 |
| 149755_at | CG10091 | FBgn0038020 | 3.16  | 6.04E-05 |
| 143184_at | CG10045 | FBgn0001149 | 3.59  | 1.43E-04 |
| 153583_at | CG4463  | FBgn0001224 | 3.72  | 1.02E-06 |
| 148908_at | CG13032 | FBgn0036652 | 3.77  | 3.41E-04 |
| 150181_at | CG6042  | FBgn0038681 | 4.66  | 3.75E-06 |
| 152866_at | CG10833 | FBgn0031689 | 7.24  | 3.28E-06 |
| 152645_at | CG7742  | FBgn0031690 | 11.72 | 3.76E-03 |

The fold change, with respect to the wild-type was calculated using the Delta-delta Ct method and p-value is a student t-test (n = 3).

## Supplemental References

1. Choe, S.E., Boutros, M., Michelson, A.M., Church, G.M., and Halfon, M.S. (2005). Preferred analysis methods for Affymetrix GeneChips revealed by a wholly defined control dataset. *Genome Biology* 6.
2. Gentleman, R.C., Carey, V.J., Bates, D.M., Bolstad, B., Dettling, M., Dudoit, S., Ellis, B., Gautier, L., Ge, Y., Gentry, J., et al. (2004). Bioconductor: open software development for computational biology and bioinformatics. *Genome Biol.* 5, R80.
3. Baldi, P., and Long, A.D. (2001). A Bayesian framework for the analysis of microarray expression data: regularized t-test and statistical inferences of gene changes. *Bioinformatics* 17, 509-519.
4. Bernardi, F., S. Duchi, V. Cavaliere, A. Donati, D. Andrenacci, and G. Gargiulo, Egfr signaling modulates VM32E gene expression during *Drosophila* oogenesis. *Dev Genes Evol*, 2007. 217(7): p. 529-40.
5. Jordan, K.C., S.D. Hatfield, M. Tworoger, E.J. Ward, K.A. Fischer, S. Bowers, and H. Ruohola-Baker, Genome wide analysis of transcript levels after perturbation of the EGFR pathway in the *Drosophila* ovary. *Dev Dyn*, 2005. 232(3): p. 709-24.
6. Claycomb, J.M., M. Benasutti, G. Bosco, D.D. Fenger, and T.L. Orr-Weaver, Gene amplification as a developmental strategy: Isolation of two developmental amplicons in *Drosophila*. *Developmental Cell*, 2004. 6(1): p. 145-155.
7. Fakhouri, M., M. Elalayli, D. Sherling, J.D. Hall, E. Miller, X. Sun, L. Wells, and E.K. LeMosy, Minor proteins and enzymes of the *Drosophila* eggshell matrix. *Dev Biol*, 2006. 293(1): p. 127-41.
8. Kleve, C.D., D.A. Siler, S.K. Syed, and E.D. Eldon, Expression of 18-wheeler in the follicle cell epithelium affects cell migration and egg morphology in *Drosophila*. *Developmental Dynamics*, 2006. 235(7): p. 1953-1961.
9. Tolia, P.P., M. Konsolaki, M.S. Halfon, N.D. Stroumbakis, and F.C. Kafatos, Elements controlling follicular expression of the s36 chorion gene during *Drosophila* oogenesis. *Mol Cell Biol*, 1993. 13(9): p. 5898-906.
10. Queenan, A.M., A. Ghabrial, and T. Schupbach, Ectopic activation of torpedo/Egfr, a *Drosophila* receptor tyrosine kinase, dorsalizes both the eggshell and the embryo. *Development*, 1997. 124(19): p. 3871-3880.
11. Deng, W.M. and M. Bownes, Two signalling pathways specify localised expression of the Broad-Complex in *Drosophila* eggshell patterning and morphogenesis. *Development*, 1997. 124(22): p. 4639-47.
12. Chen, Y. and T. Schupbach, The role of brinker in eggshell patterning. *Mechanisms of Development*, 2006. 123(5): p. 395-406.
13. Lin, S., D.B. Zhao, and M. Bownes, Blood vessel/epicardial substance (bves) expression, essential for embryonic development, is down regulated by Grk/EFGR signalling. *International Journal of Developmental Biology*, 2007. 51(1): p. 37-44.
14. D'Alterio, C., D.D.D. Tran, M. Yeung, M.S.H. Hwang, M.A. Li, C.J. Arana, V.K. Mulligan, M. Kubesh, P. Sharma, M. Chase, U. Tepass, and D. Godt, *Drosophila melanogaster* Cad99C, the orthologue of human Usher cadherin PCDH15, regulates the length of microvilli. *Journal of Cell Biology*, 2005. 171(3): p. 549-558.
15. Gupta, T. and T. Schupbach, Cct1, a phosphatidylcholine biosynthesis enzyme, is required for *Drosophila* oogenesis and ovarian morphogenesis. *Development*, 2003. 130(24): p. 6075-6087.

16. Twombly, V., R.K. Blackman, H. Jin, J.M. Graff, R.W. Padgett, and W.M. Gelbart, The TGF-beta signaling pathway is essential for Drosophila oogenesis. *Development*, 1996. 122(5): p. 1555-65.
17. Buszczak, M., M.R. Freeman, J.R. Carlson, M. Bender, L. Cooley, and W.A. SeGRAves, Ecdysone response genes govern egg chamber development during mid-oogenesis in Drosophila. *Development*, 1999. 126(20): p. 4581-4589.
18. Bryant, Z., L. Subrahmanyam, M. Tworoger, L. LaTray, C.R. Liu, M.J. Li, G. van den Engh, and H. Ruohola-Baker, Characterization of differentially expressed genes in purified Drosophila follicle cells: toward a general strategy for cell type-specific developmental analysis. *Proc Natl Acad Sci*, 1999. 96(10): p. 5559-64.
19. Papadia, S., G. Tzolovsky, D.B. Zhao, K. Leaper, D. Clyde, P. Taylor, E. Asscher, G. Kirk, and M. Bownes, emc has a role in dorsal appendage fate formation in Drosophila oogenesis. *Mechanisms of Development*, 2005. 122(9): p. 961-974.
20. Jordan, K.C., N.J. Clegg, J.A. Blasi, A.M. Morimoto, J. Sen, D. Stein, H. McNeill, W.M. Deng, M. Tworoger, and H. Ruohola-Baker, The homeobox gene mirror links EGF signalling to embryonic dorso-ventral axis formation through Notch activation. *Nature Genetics*, 2000. 24(4): p. 429-433.
21. Deng, W.M., K. Leaper, and M. Bownes, A targeted gene silencing technique shows that Drosophila myosin VI is required for egg chamber and imaginal disc morphogenesis. *Journal of Cell Science*, 1999. 112(21): p. 3677-3690.
22. Doerflinger, H., J.A. Lepesant, and C. Yanicostas, Differential expression of the Drosophila zinc finger gene jim in the follicular epithelium. *Mech Dev*, 1999. 86(1-2): p. 177-82.
23. Dequier, E., S. Soudi, M. Pal, P. Maroy, J.A. Lepesant, and C. Yanicostas, Top-DER- and Dpp-dependent requirements for the Drosophila fos/kayak gene in follicular epithelium morphogenesis. *Mech Dev*, 2001. 106(1-2): p. 47-60.
24. Pathirana, S., D. Zhao, and M. Bownes, The Drosophila RGS protein Loco is required for dorsal/ventral axis formation of the egg and embryo, and nurse cell dumping. *Mechanisms of Development*, 2001. 109(2): p. 137-150.
25. Sen, J., J.S. Goltz, L. Stevens, and D. Stein, Spatially restricted expression of pipe in the Drosophila egg chamber defines embryonic dorsal-ventral polarity. *Cell*, 1998. 95(4): p. 471-481.
26. Morimoto, A.M., K.C. Jordan, K. Tietze, J.S. Britton, E.M. O'Neill, and H. Ruohola-Baker, Pointed, an ETS domain transcription factor, negatively regulates the EGF receptor pathway in Drosophila oogenesis. *Development*, 1996. 122(12): p. 3745-54.
27. Dobens, L.L., E. Martin-Blanco, A. Martinez-Arias, F.C. Kafatos, and L.A. Raftery, Drosophila puckered regulates Fos/Jun levels during follicle cell morphogenesis. *Development*, 2001. 128(10): p. 1845-1856.
28. Ruoholabaker, H., E. Grell, T.B. Chou, D. Baker, L.Y. Jan, and Y.N. Jan, Spatially Localized Rhomboid Is Required for Establishment of the Dorsal-Ventral Axis in Drosophila Oogenesis. *Cell*, 1993. 73(5): p. 953-965.
29. Petryk, A., J.T. Warren, G. Marques, M.P. Jarcho, L.I. Gilbert, J. Kahler, J.P. Parvy, Y.T. Li, C. Dauphin-Villemant, and M.B. O'Connor, Shade is the Drosophila P450 enzyme that mediates the hydroxylation of ecdysone to the steroid insect molting hormone 20-hydroxyecdysone. *Proceedings of the National Academy of Sciences of the United States of America*, 2003. 100(24): p. 13773-13778.
30. Montell, D.J., P. Rorth, and A.C. Spradling, Slow Border Cells, a Locus Required for a Developmentally Regulated Cell-Migration During Oogenesis, Encodes Drosophila C/Ebp. *Cell*, 1992. 71(1): p. 51-62.



31. Muzzopappa, M. and P. Wappner, Multiple roles of the F-box protein Slimb in *Drosophila* egg chamber development. *Development*, 2005. 132(11): p. 2561-2571.
32. Shravage, B.V., G. Altmann, M. Technau, and S. Roth, The role of Dpp and its inhibitors during eggshell patterning in *Drosophila*. *Development*, 2007. 134(12): p. 2261-71.
33. Araujo, H. and E. Bier, sog and dpp exert opposing maternal functions to modify toll signaling and pattern the dorsoventral axis of the *Drosophila* embryo. *Development*, 2000. 127(16): p. 3631-44.
34. Reich, A., A. Sapir, and B.Z. Shilo, Sprouty, a general inhibitor of receptor tyrosine kinase signaling. *Development*, 1999. 126(18): p. 413-47.
35. Mantrova, E.Y., R.A. Schulz, and T. Hsu, Oogenic function of the myogenic factor D-MEF2: Negative regulation of the Decapentaplegic receptor gene thick veins. *Proceedings of the National Academy of Sciences of the United States of America*, 1999. 96(21): p. 11889-11894.
36. Andrenacci, D., V. Cavaliere, F.M. Cernilogar, and G. Gargiulo, Spatial activation and repression of the *drosophila* vitelline membrane gene VM32E are switched by a complex cis-regulatory system. *Dev Dyn*, 2000. 218(3): p. 499-506.
37. Wasserman, J.D. and M. Freeman, An autoregulatory cascade of EGF receptor signaling patterns the *Drosophila* egg. *Cell*, 1998. 95: p. 355-364.
