# Supplementary material
Source: PubMed Central journal article supplement (PMC2822874)
Supplement: NIHMS79593-supplement-02.pdf [file NIHMS79593-supplement-02.pdf]

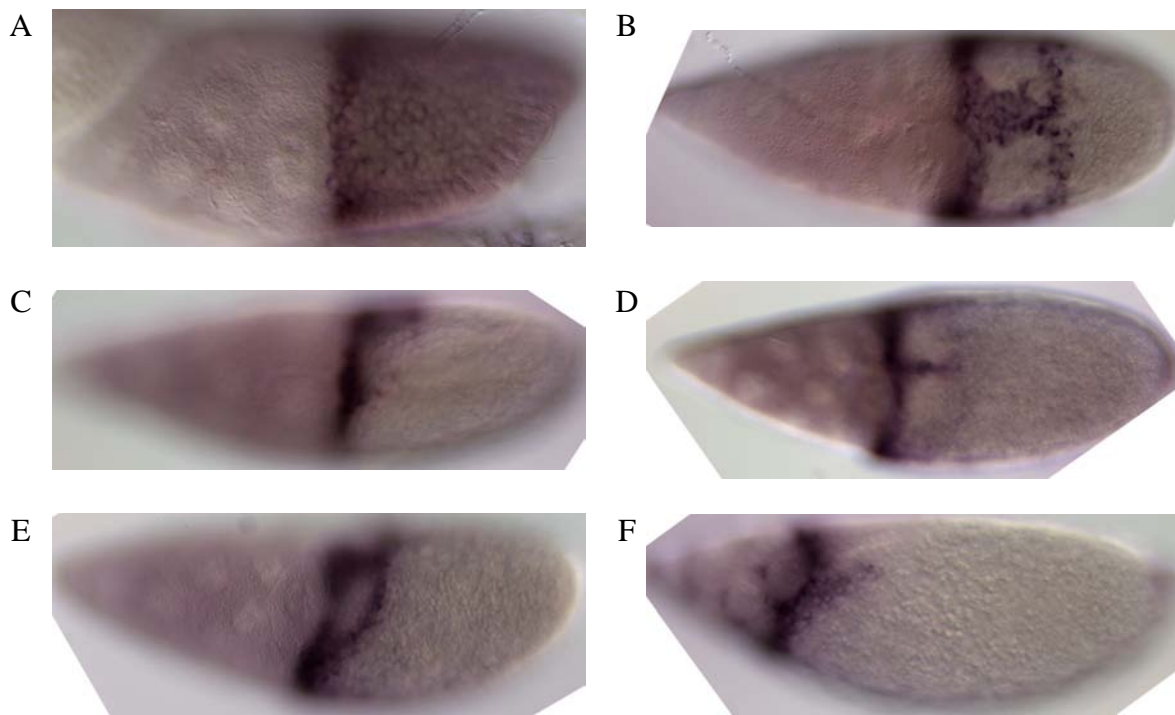

Figure P1. Representative gene expression patterns and annotations for *I8w*. (A) Stage 10A:  $A+U$ . (B) Stage 10B, dorsal view:  $A \cup D \setminus R$ . (C) Stage 10B, lateral view:  $A \cup D \setminus R$ . (D) Stage 11, dorsal view:  $A \cup D \setminus R$ . (E) Stage 11, lateral view:  $A \cup D \setminus R$ . (F) Stage 12:  $A \cup M$ .

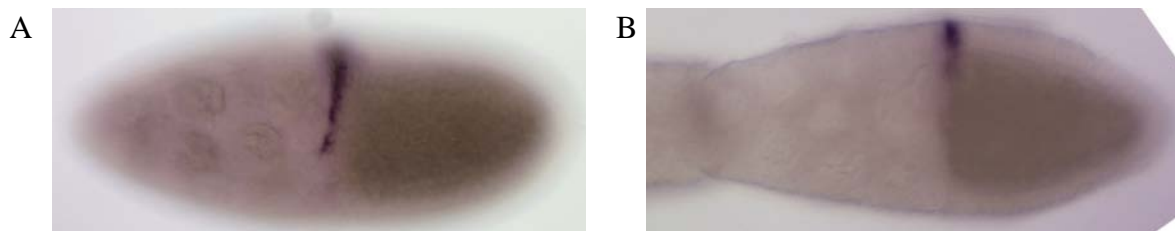

Figure P2. Representative gene expression patterns and annotations for *ana*. (A) Stage 10A:  $A \cap D$ . (B) Stage 10B:  $A \cap D$ .

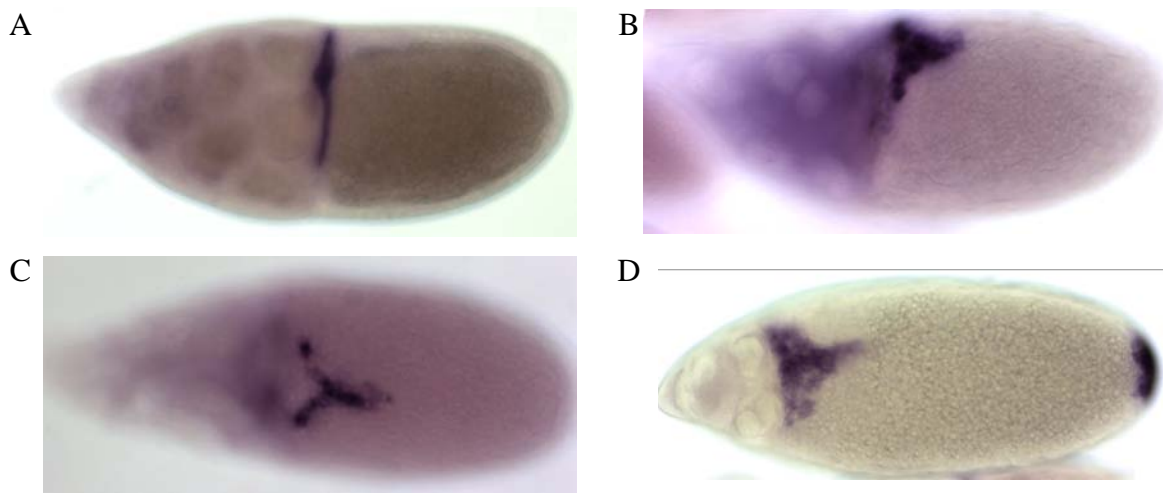

Figure P3. Representative gene expression patterns and annotations for *argos*. (A) Stage 10B: A∩D. (B) Stage 11, lateral view: M. (C) Stage 11, dorsal view: M (D) Stage 12: M.

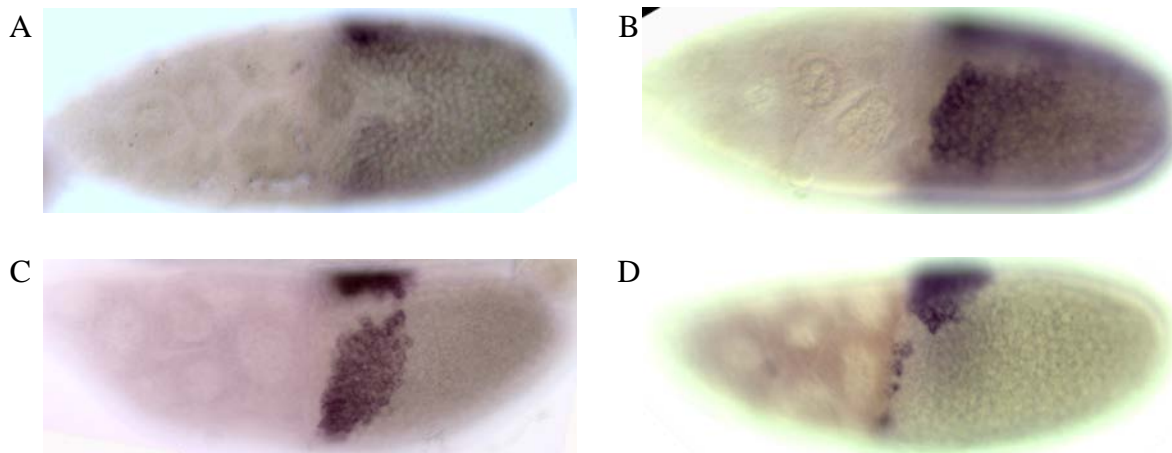

Figure P4. Representative gene expression patterns and annotations for *br*. (A) Stage 10A, dorsal view: U\M. (B) Stage 10A, lateral view: U\M. (C) Stage 10B, dorsal view: A∩D∪R. (D) Stage 10B, lateral view: A∩D∪R.

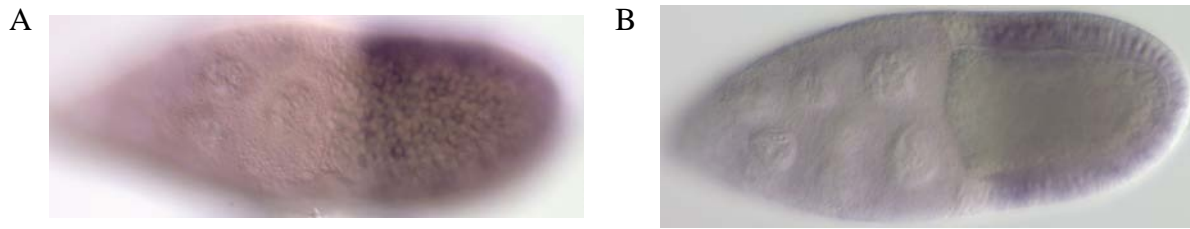

Figure P5. Representative gene expression patterns and annotations for *brk*. (A) Stage 10A: U\A. (B) Stage 10B: U\A.

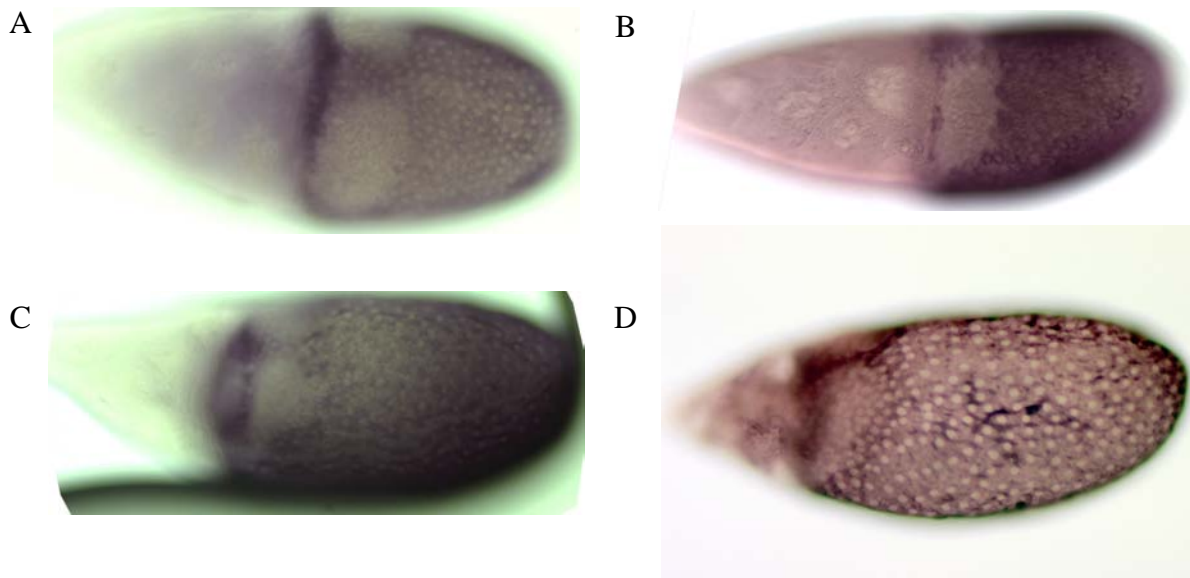

Figure P6. Representative gene expression patterns and annotations for *Cad74A*. (A) Stage 10B, dorsal view: U\R. (B) Stage 10B, lateral view: U\R. (C) Stage 11: U\R. (D) Stage 12: U\R.

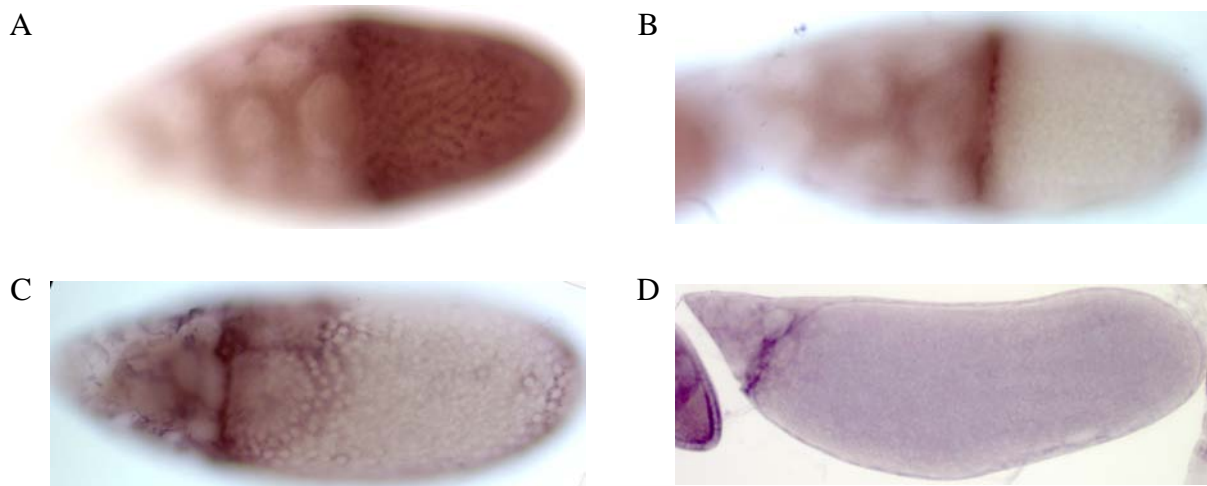

Figure P7. Representative gene expression patterns and annotations for *Cad99C*. (A) Stage 10A: U. (B) Stage 10B: A. (C) Stage 11:  $A \cup D \setminus R$ . (D) Stage 12:  $A \setminus D$ .

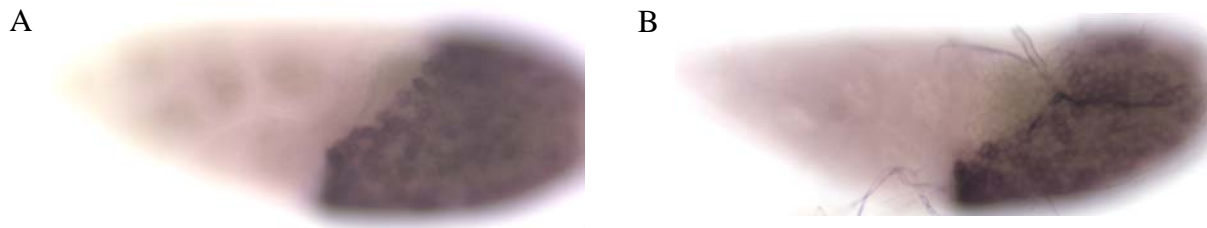

Figure P8. Representative gene expression patterns and annotations for *CG2052*. (A) Stage 10A:  $U \setminus D$ . (B) Stage 10B:  $U \setminus D$ .



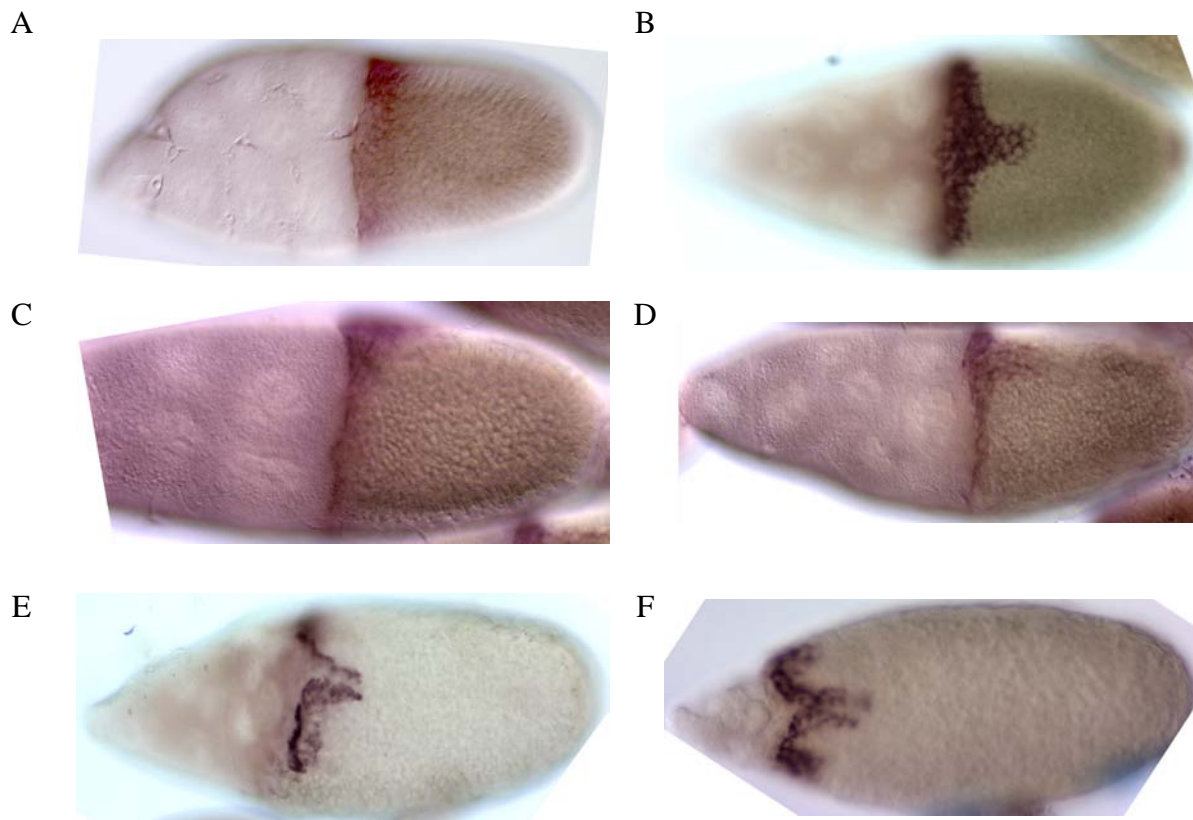

Figure P9. Representative gene expression patterns and annotations for *CG3074*. (A) Stage 10A: A. (B) Stage 10B, dorsal view: A∪M. (C) Stage 10B, lateral view: A∪M. (D) Stage 10B, lateral view: A∪M. (E) Stage 11: F. (F) Stage 12: F.

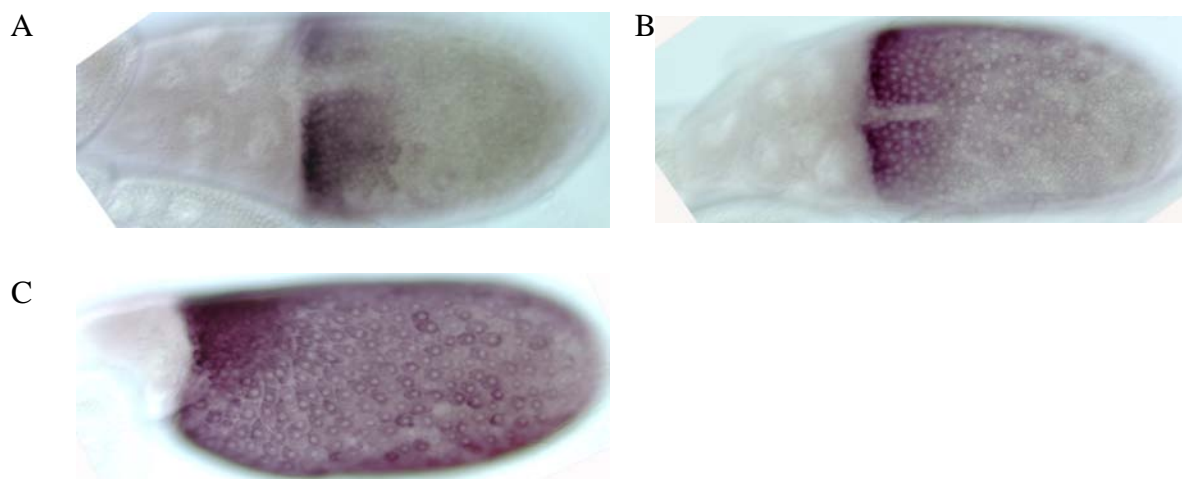

Figure P10. Representative gene expression patterns and annotations for *CG4009*. (A) Stage 10B: D\M. (B) Stage 11: D\M. (C) Stage 12: D+U.

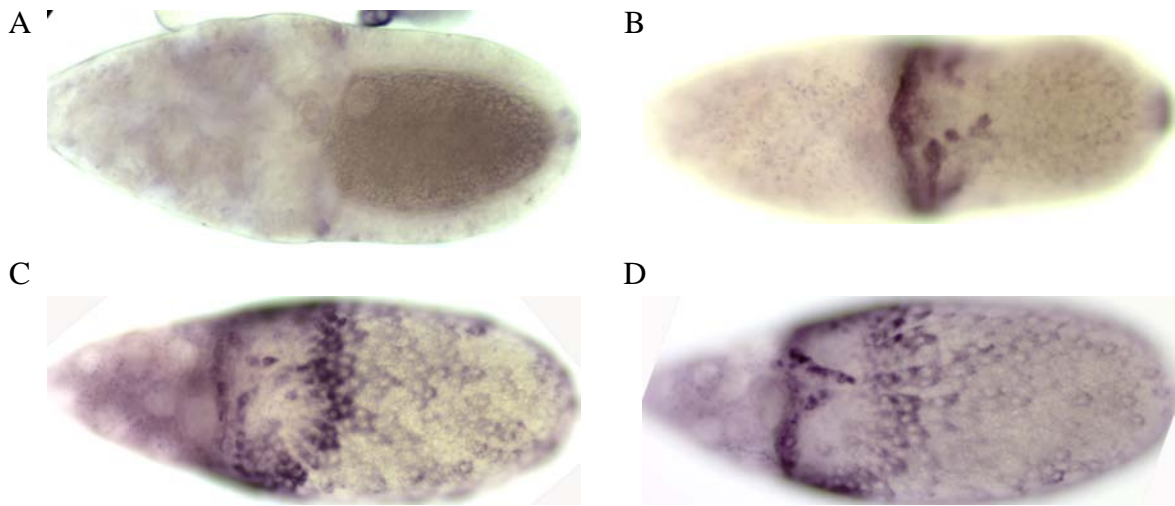

Figure P11. Representative gene expression patterns and annotations for *CG4998*. (A) Stage 10A: A. (B) Stage 10B:  $A \cup D \setminus (M \cup R)$ . (C) Stage 11:  $A \cup D \setminus (M \cup R)$ . (D) Stage 12:  $A \cup D \setminus (M \cup R)$ .

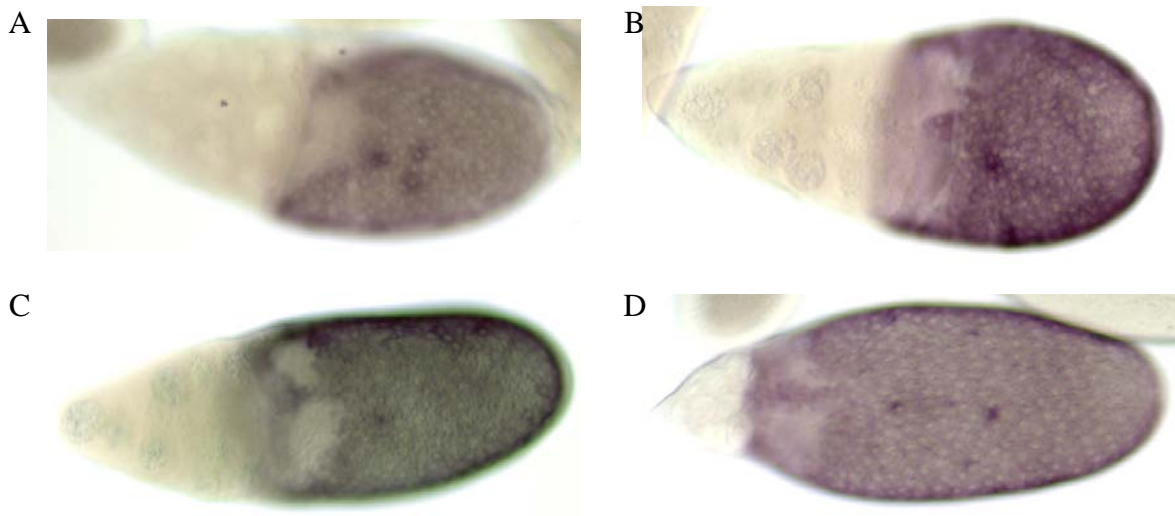

Figure P12. Representative gene expression patterns and annotations for *CG11381*. (A) Stage 10A:  $M \cup U \setminus D$ . (B) Stage 10B:  $M \cup U \setminus D$ . (C) Stage 11:  $M \cup U \setminus D$ . (D) Stage 12:  $M \cup U \setminus D$ .

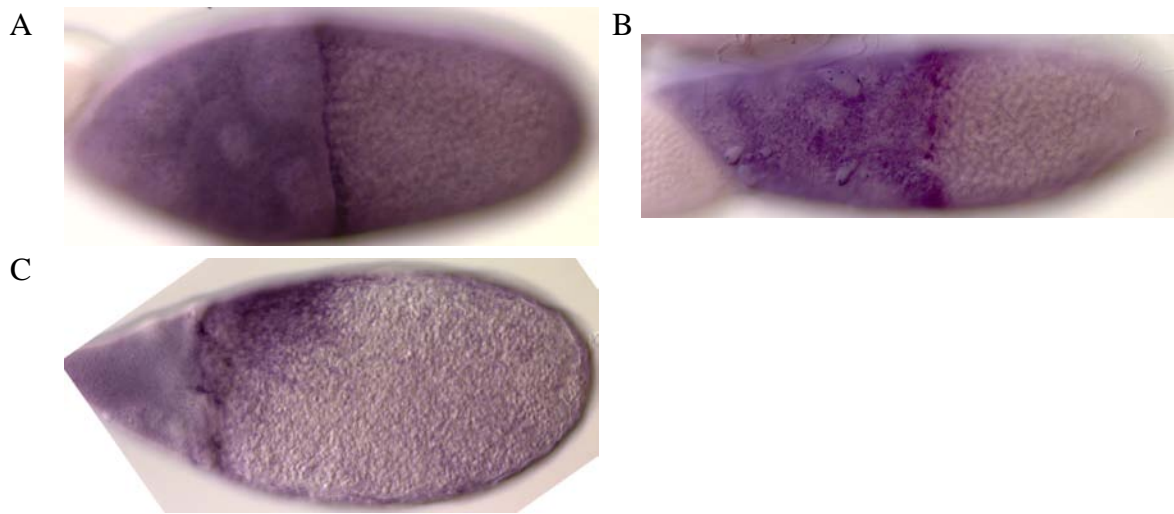

Figure P13. Representative gene expression patterns and annotations for *CG11880*. (A) Stage 10A: A. (B) Stage 10B: A. (C) Stage 12:  $A \cup D$ .

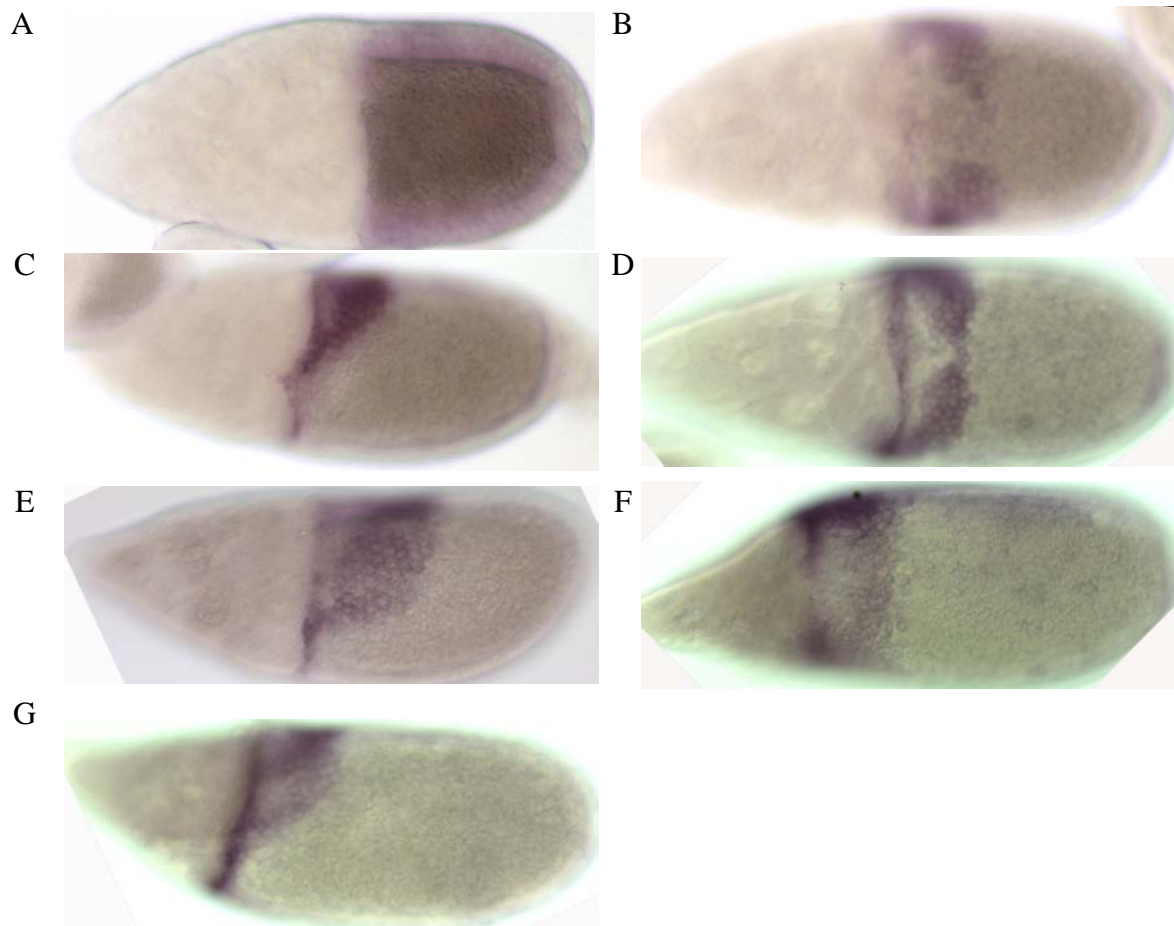

Figure P14. Representative gene expression patterns and annotations for *CG12068*. (A) Stage 10A: U. (B) Stage 10B, dorsal view:  $(A \cup D) \setminus M$ . (C) Stage 10B, lateral view:  $(A \cup D) \setminus M$ . (D) Stage 11, dorsal view:  $A \cup D \setminus F$ . (E) Stage 11, lateral view:  $A \cup D \setminus F$ . (F) Stage 12, dorsal view:  $(A \cup D) \setminus M$ . (G) Stage 12, lateral view:  $(A \cup D) \setminus M$ .

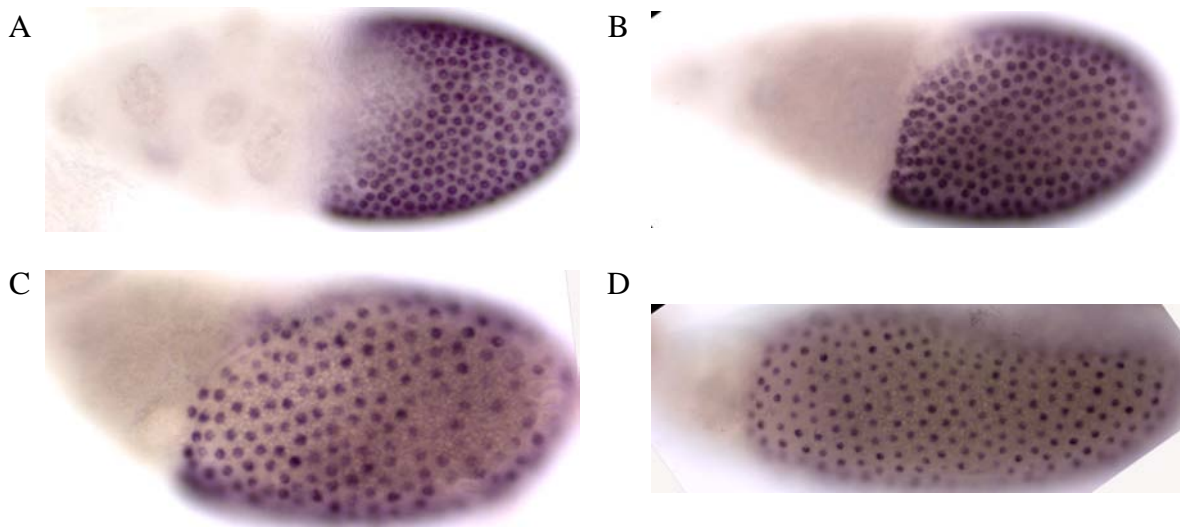

Figure P15. Representative gene expression patterns and annotations for *CG15324*. (A) Stage 10B, dorsal view: U\M. (B) Stage 10B, lateral view: U\M. (C) Stage 11: U. (D) Stage 12: U.

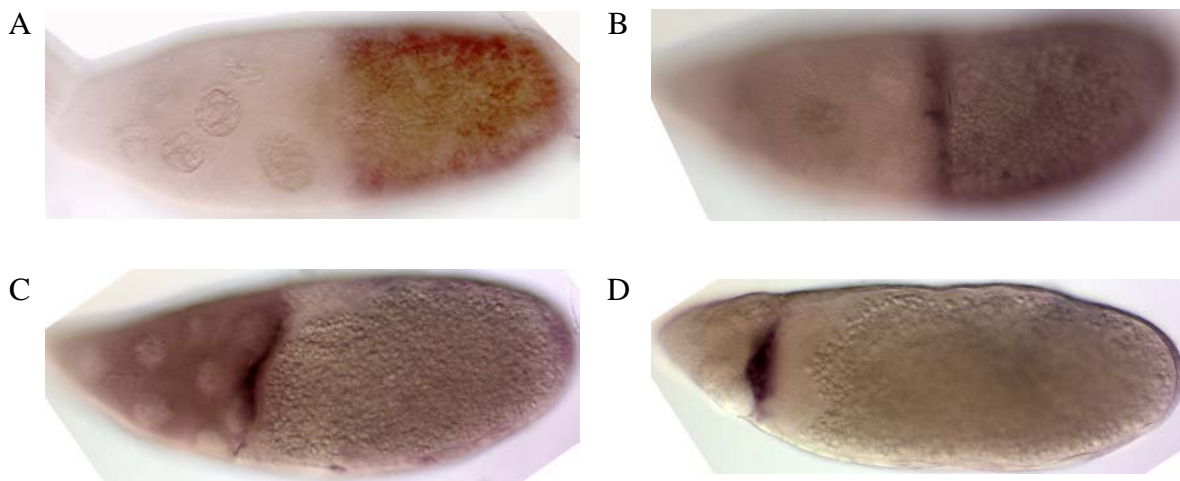

Figure P16. Representative gene expression patterns and annotations for *CG31522*. (A) Stage 10A: U. (B) Stage 10B: A+U. (C) Stage 11: A. (D) Stage 12: A.



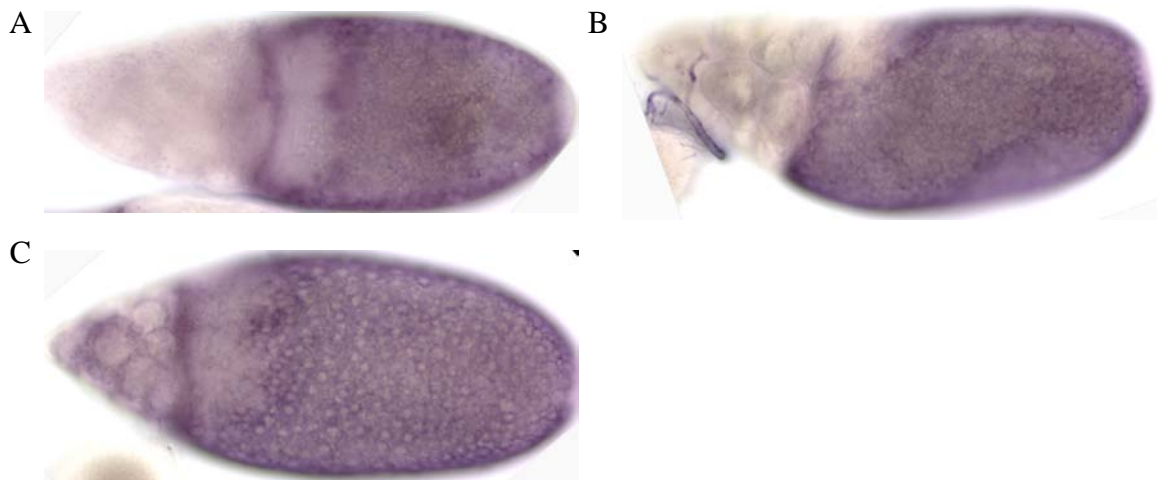

Figure P17. Representative gene expression patterns and annotations for *CG31900*. (A) Stage 11, dorsal view: A∪U\D. (B) Stage 11, lateral view: A∪U\D (C) Stage 12: A∪U\D.

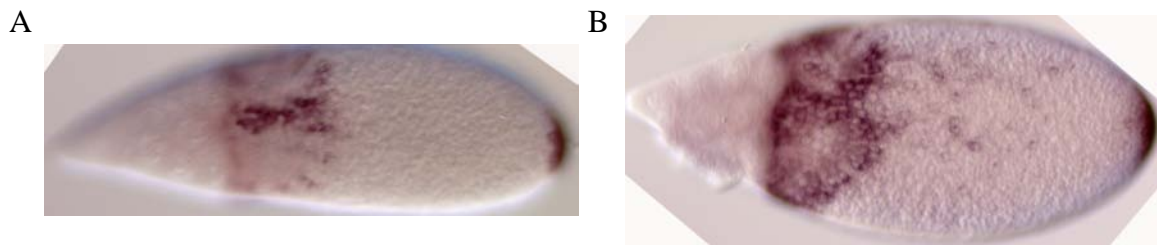

Figure P18. Representative gene expression patterns and annotations for *CG32774*. (A) Stage 11: D\R. (B) Stage 12: D\R.

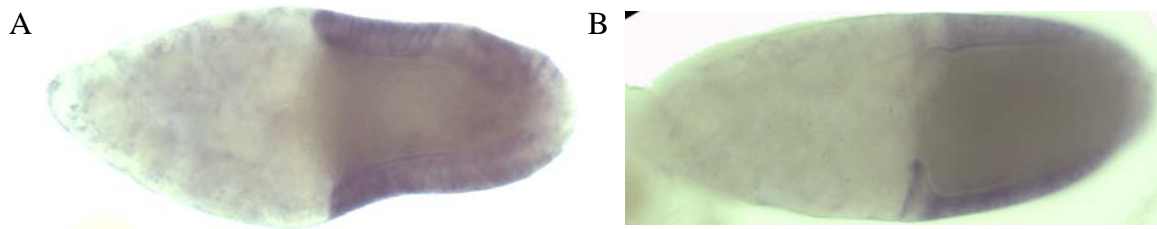

Figure P19. Representative gene expression patterns and annotations for *CG33099*. (A) Stage 10A: U. (B) Stage 10B: A\D∪U\A.

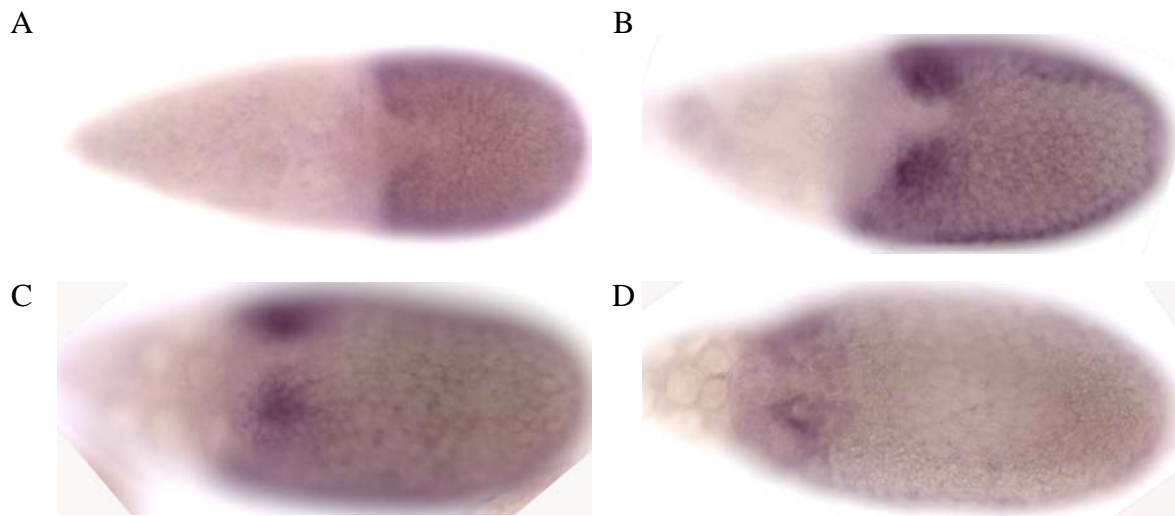

Figure P20. Representative gene expression patterns and annotations for *CG34417*. (A) Stage 10A: U\M. (B) Stage 10B: U\M+R. (C) Stage 11: U\M+R. (D) Stage 12: R.

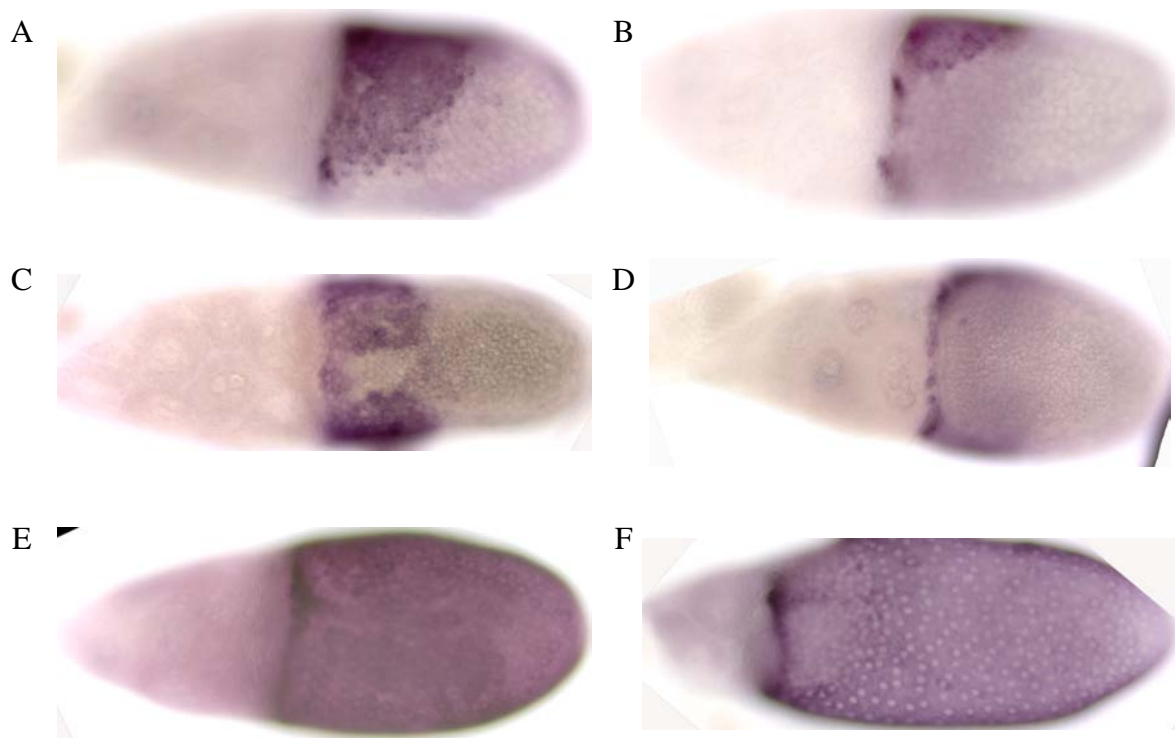

Figure P21. Representative gene expression patterns and annotations for *Cp7Fb*. (A) Stage 10A, lateral view: A\cup D. (B) Stage 10A, lateral view: A\cup D. (C) Stage 10B, dorsal view: A\cup R. (D) Stage 10B, ventral view: A\cup R. (E) Stage 11: U\F. (F) Stage 12: U\R.



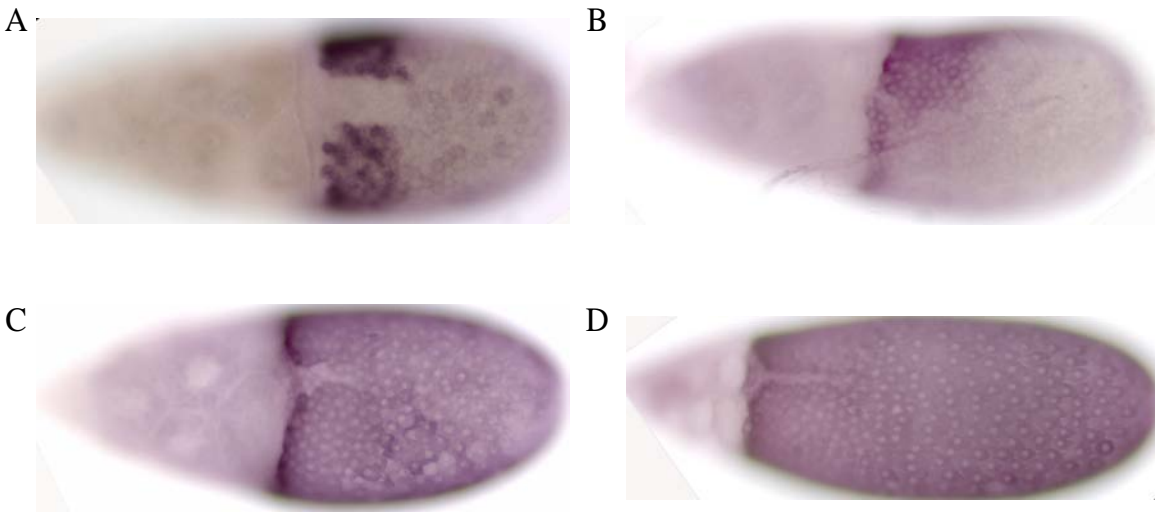

Figure P22. Representative gene expression patterns and annotations for *Cp7Fc*. (A) Stage 10B, dorsal view,  $(A \cup D) \setminus M$  (B) Stage 10B, lateral view,  $(A \cup D) \setminus M$  (C) Stage 12,  $(A+U) \setminus M$ . (D) Stage 12,  $(A+U) \setminus M$ .

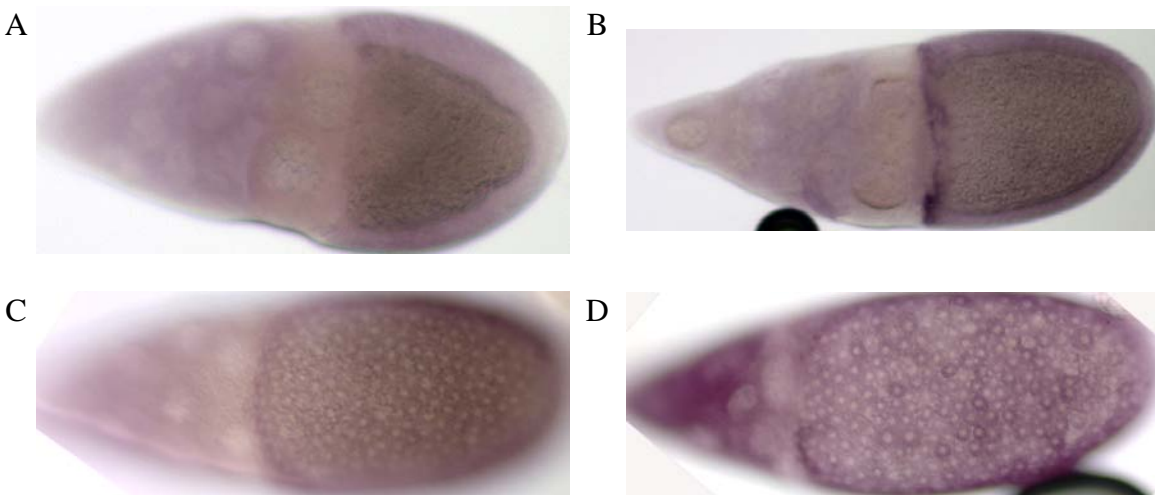

Figure P23. Representative gene expression patterns and annotations for *Cp15*. (A) Stage 10A: U. (B) Stage 10B: A+U. (C) Stage 11: U. (D) Stage 12: U.

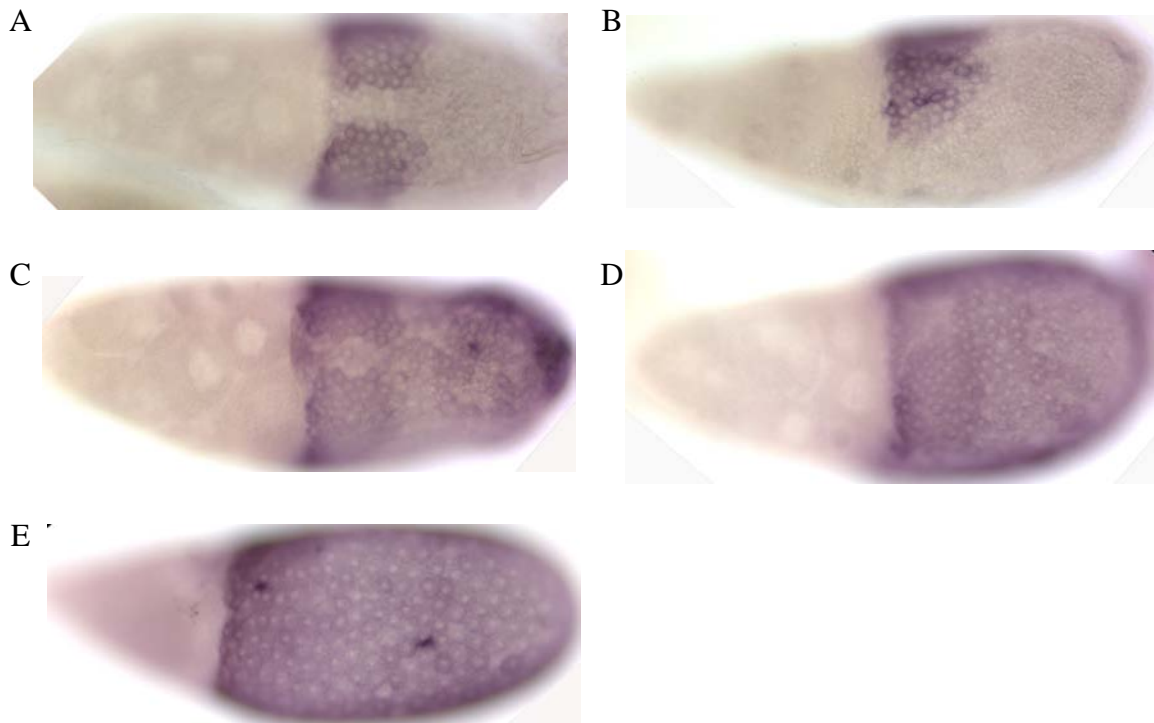

Figure P24. Representative gene expression patterns and annotations for *Cp38*. (A) Stage 10B, dorsal view: D\M. (B) Stage 10B, lateral view: D\M. (C) Stage 11: (A+U)\M. (D) Stage 11: (A+U)\M. (E) Stage 12: U.

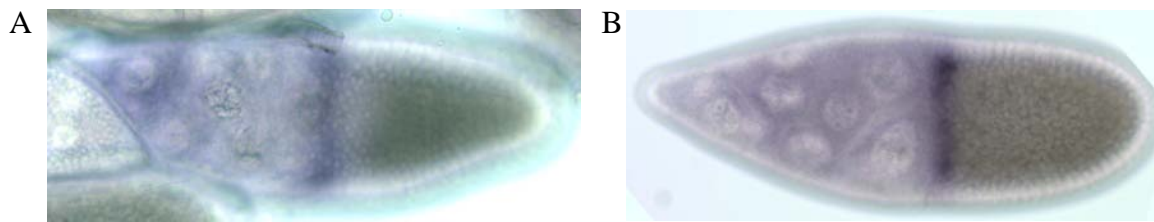

Figure P25. Representative gene expression patterns and annotations for *Dad*. (A) Stage 10A: A. (B) Stage 10B: A.

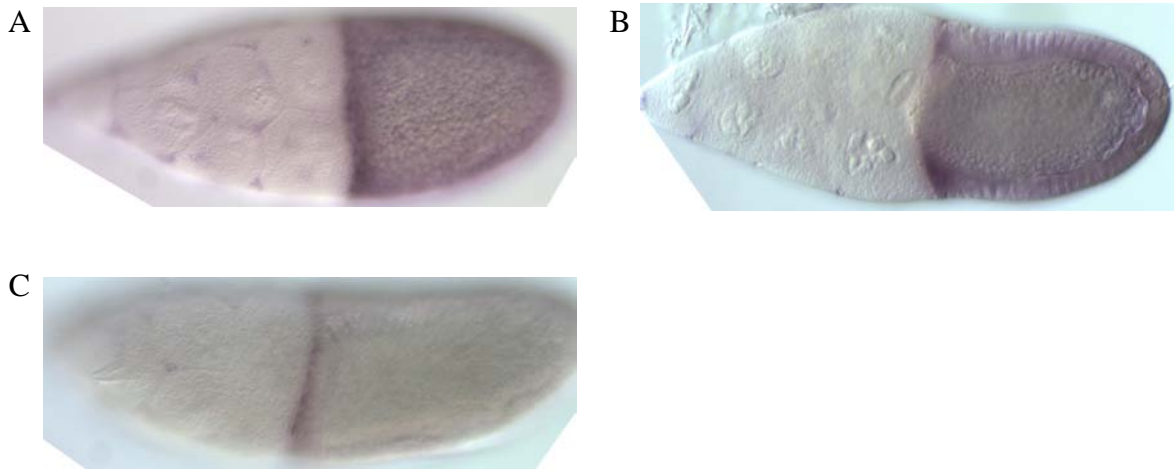

Figure P26. Representative gene expression patterns and annotations for *dally*. (A) Stage 10A: A+U. (B) Stage 10B: A+U. (C) Stage 11: A\D.

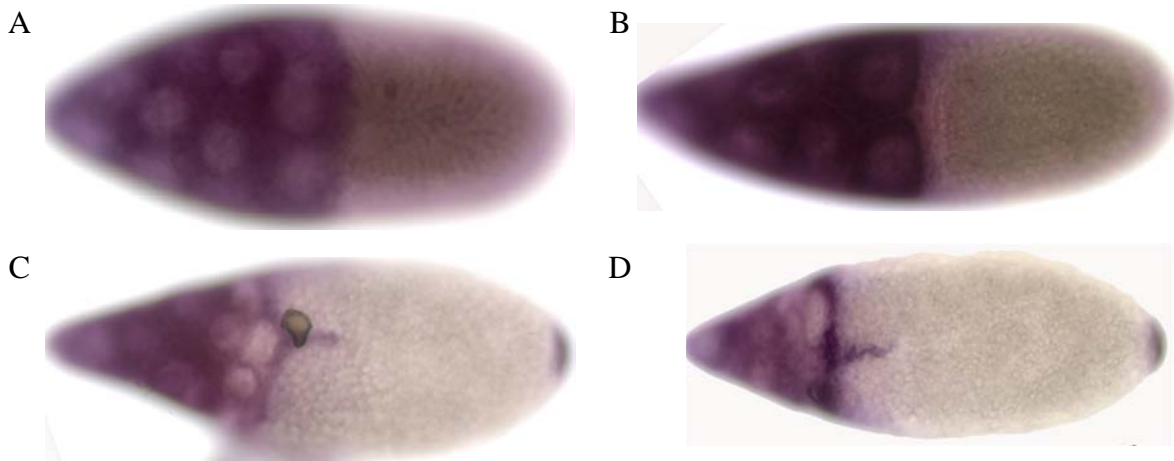

Figure P27. Representative gene expression patterns and annotations for *drk/Grb2*. (A) Stage 10A: U. (B) Stage 10B: U. (C) Stage 11: M. (D) Stage 12: M.

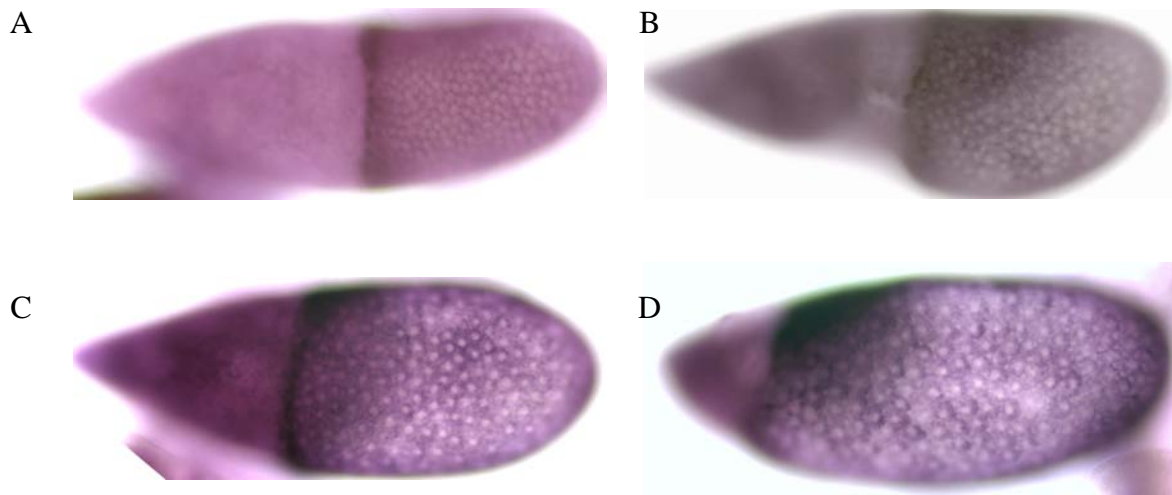

Figure P28. Representative gene expression patterns and annotations for *Fkbp13*. (A) Stage 10A: A+U. (B) Stage 10B: A∪D+U. (C) Stage 11: A∪D+U. (D) Stage 12: A∪D+U.

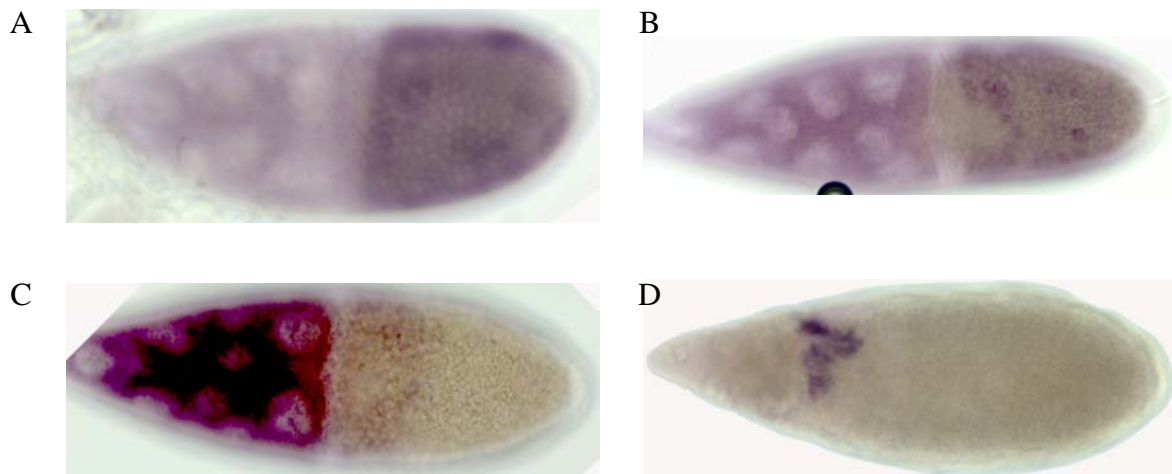

Figure P29. Representative gene expression patterns and annotations for *GstE1*. (A) Stage 10A: U∖A. (B) Stage 10B: U∖M. (C) Stage 11: R. (D) Stage 12: F.

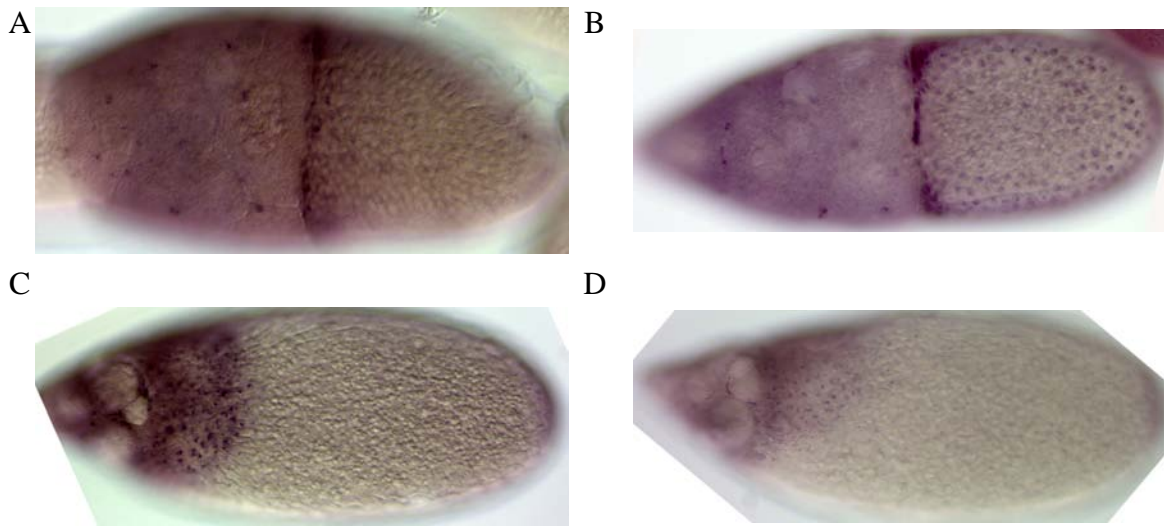

Figure P30. Representative gene expression patterns and annotations for *Hsp68*. (A) Stage 10A: A. (B) Stage 10B: A+U. (C) Stage 12, dorsal view: D\R. (D) Stage 12, lateral view: D\R.

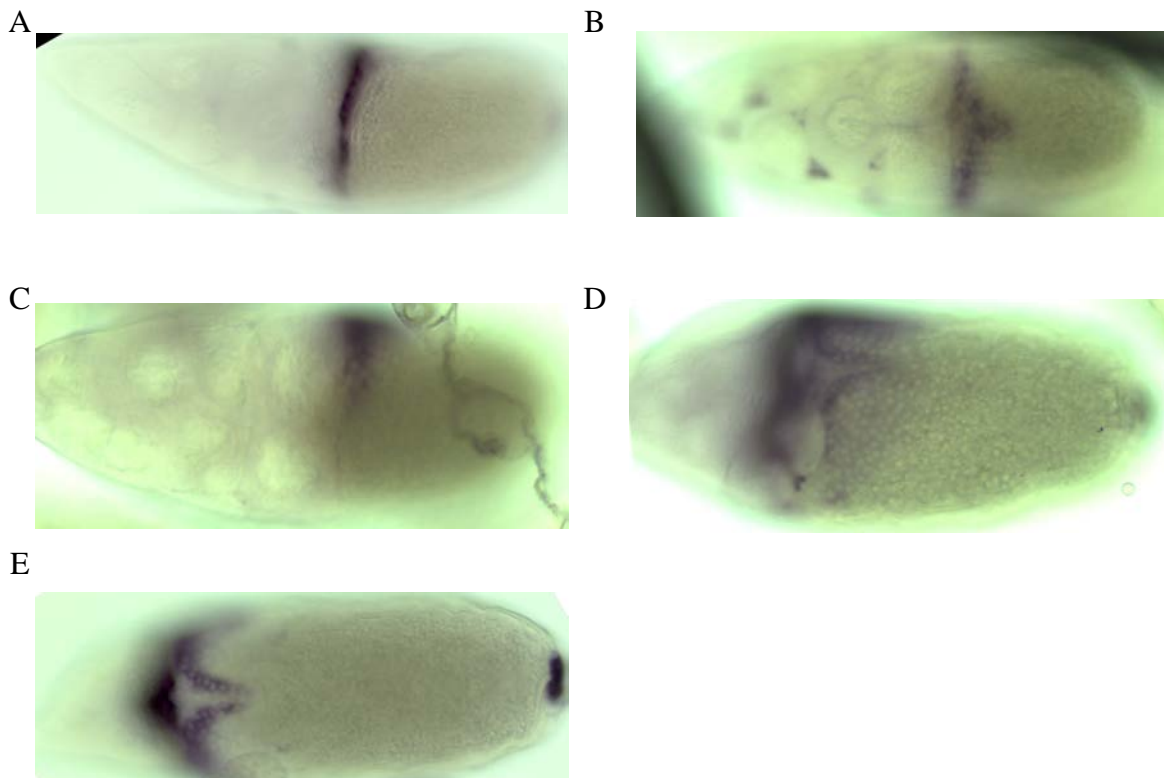

Figure P31. Representative gene expression patterns and annotations for *ImpL2*. (A) Stage 10A: A. (B) Stage 10B, dorsal view: M. (C) Stage 10B, lateral view: M. (D) Stage 11: F $\cup$ R. (E) Stage 12: F.



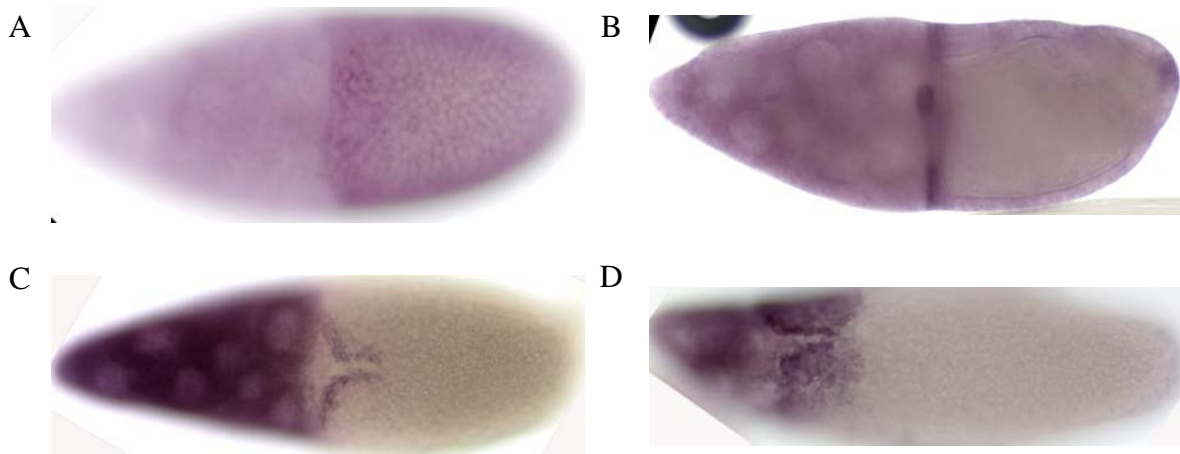

Figure P32. Representative gene expression patterns and annotations for *jar*. (A) Stage 10A: U. (B) Stage 10B: A+U. (C) Stage 11: F. (D) Stage 12: F∪R.

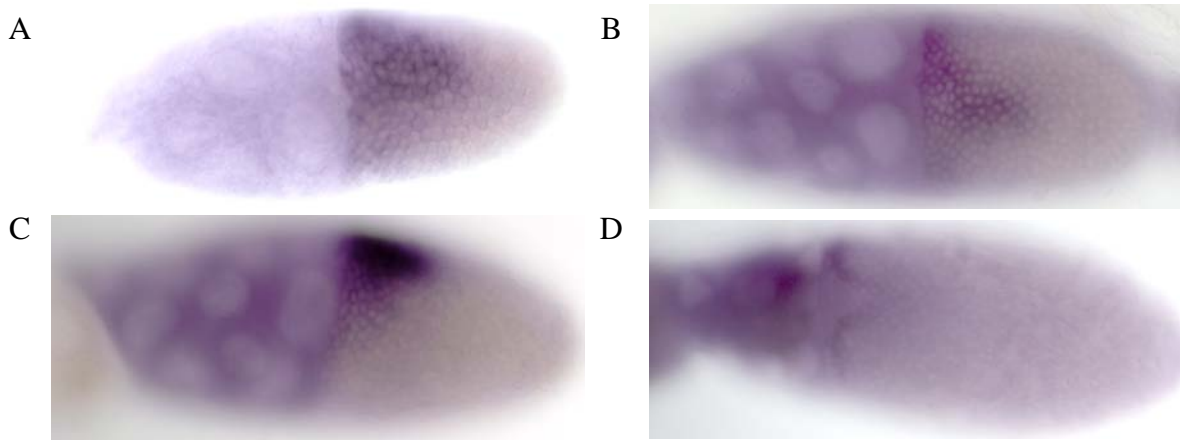

Figure P33. Representative gene expression patterns and annotations for *kekl*. (A) Stage 10A, dorsal view: M. (B) Stage 10B, dorsal view: M. (C) Stage 10B, lateral view: M. (D) Stage 11: F.



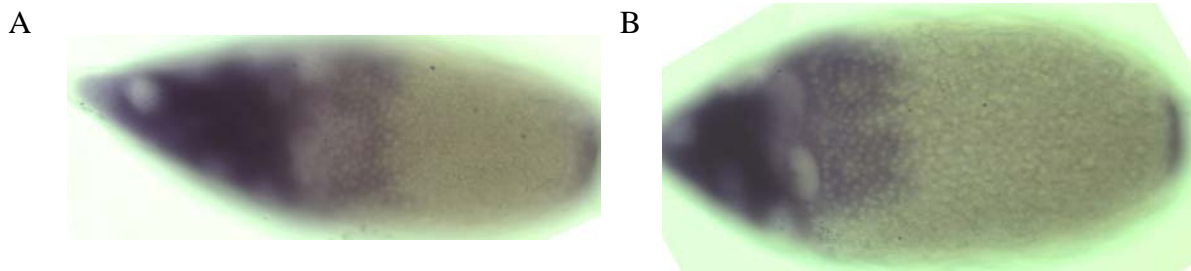

Figure P34. Representative gene expression patterns and annotations for *melt*. (A) Stage 11: D. (B) Stage 12: D\M.

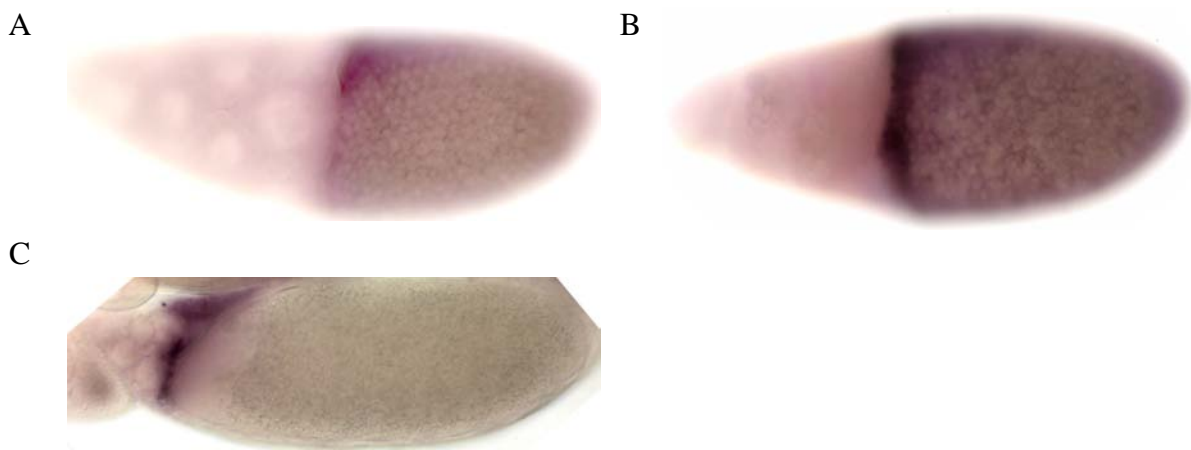

Figure P35. Representative gene expression patterns and annotations for *mia*. (A) Stage 10B:  $A \cap D$ . (B) Stage 11:  $A + U$ . (C) Stage 12: A.

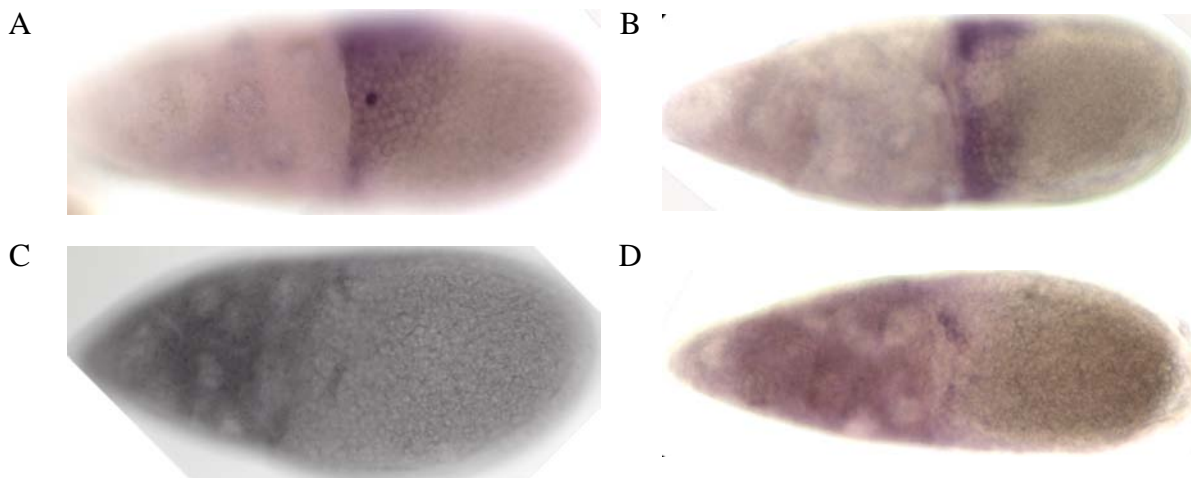

Figure P36. Representative gene expression patterns and annotations for *mirr*. (A) Stage 10A:  $A \cup D$ . (B) Stage 10B:  $A \cup R$ . (C) Stage 11: F. (D) Stage 11: F.

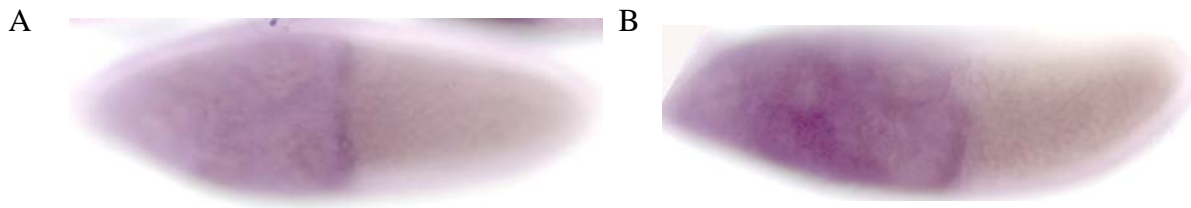

Figure P37. Representative gene expression patterns and annotations for *Phky*. (A) Stage 10A: A. (B) Stage 10B: A\D.

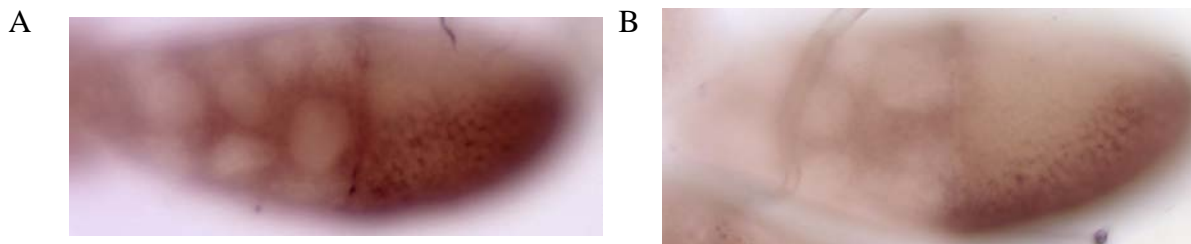

Figure P38. Representative gene expression patterns and annotations for *pip-RA*. (A) Stage 10A: A∪U\D. The anterior band is more pronounced in Peri *et al*, 2002. (B) Stage 10B: U\D.

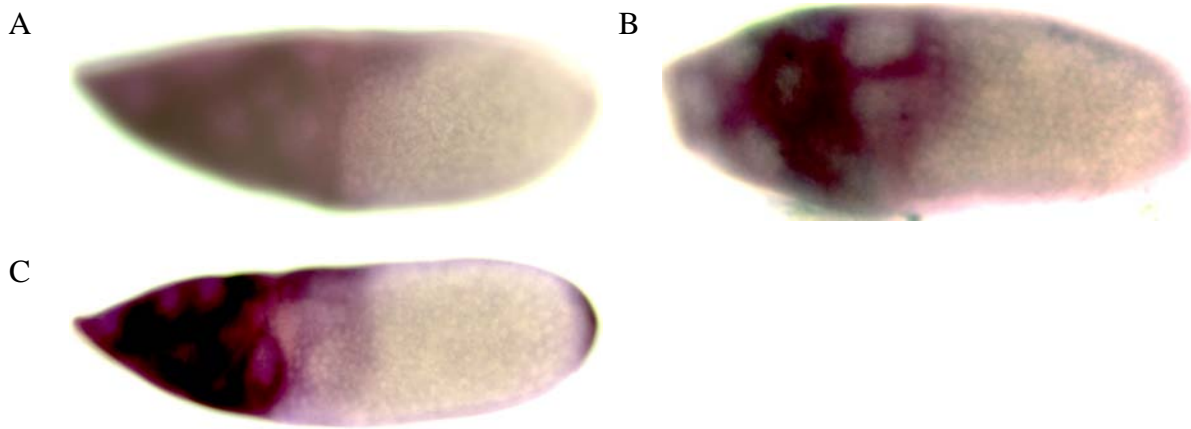

Figure P39. Representative gene expression patterns and annotations for *pnt-P1*. (A) Stage 10A: A∪M. (B) Stage 10B: A∪M. (C) Stage 11: F

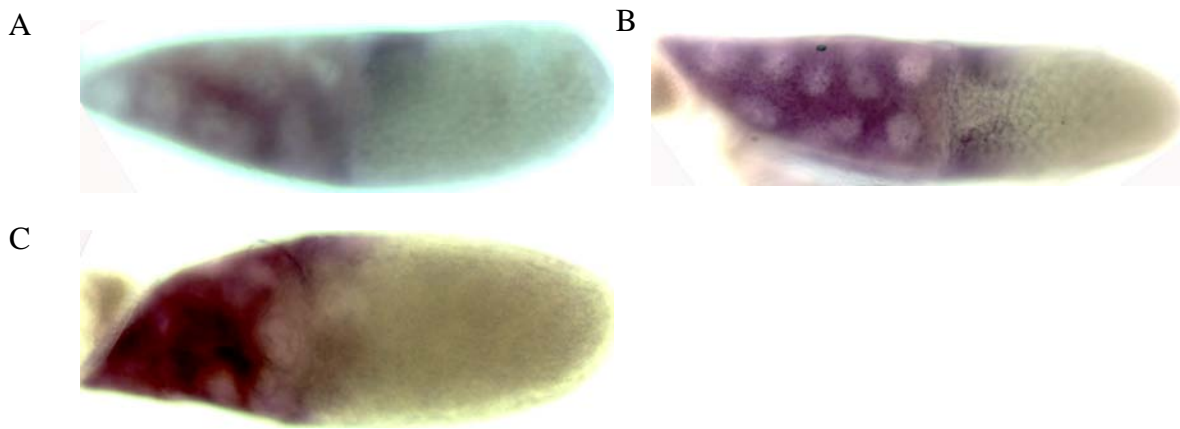

Figure P40. Representative gene expression patterns and annotations for *pnt-P2*. (A) Stage 10A: M. (B) Stage 10B: R. (C) Stage 11: R.

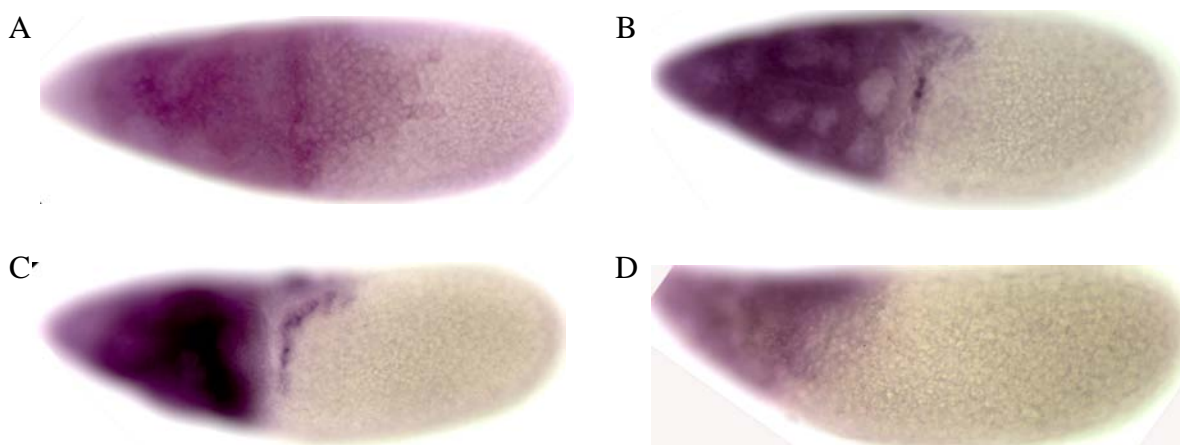

Figure P41. Representative gene expression patterns and annotations for *Ras85D*. (A) Stage 10A: D. (B) Stage 10B: F. (C) Stage 11: F. (D) Stage 12: F.

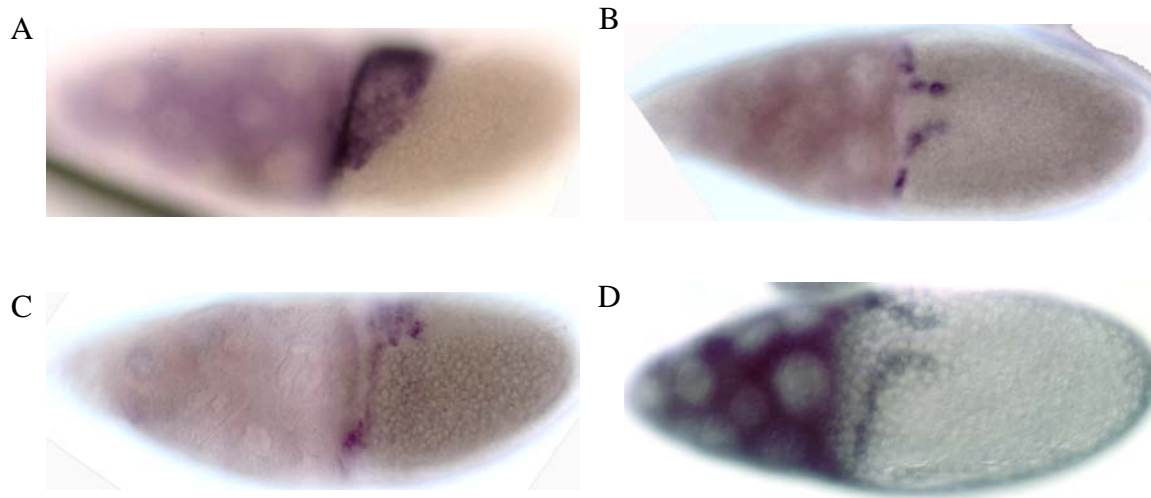

Figure P42. Representative gene expression patterns and annotations for *rho*. (A) Stage 10A: D\M. (B) Stage 10B, dorsal view: F. (C) Stage 10B, lateral view: F. (D) Stage 11: F.

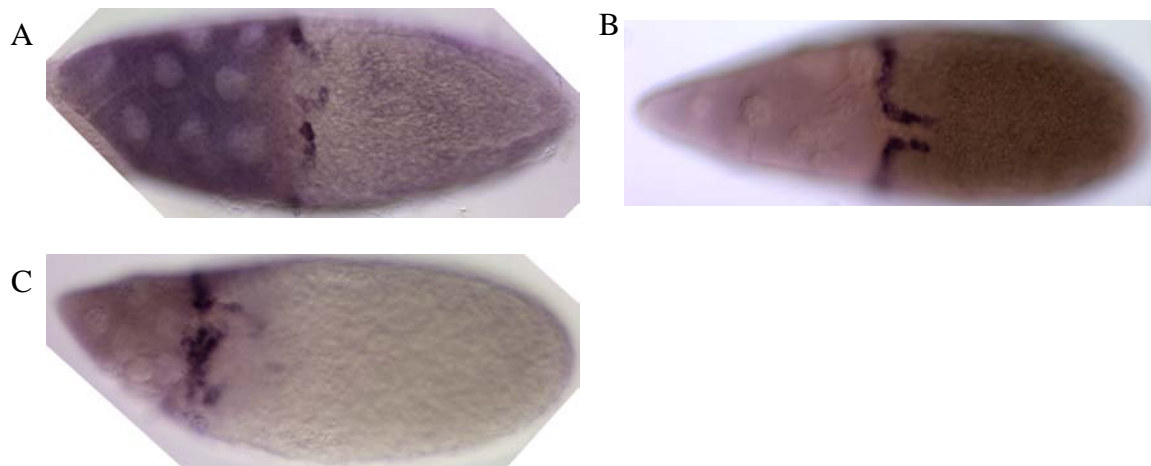

Figure P43. Representative gene expression patterns and annotations for *scarface*. (A) Stage 10B: F. (B) Stage 11: F. (C) Stage 12: F.

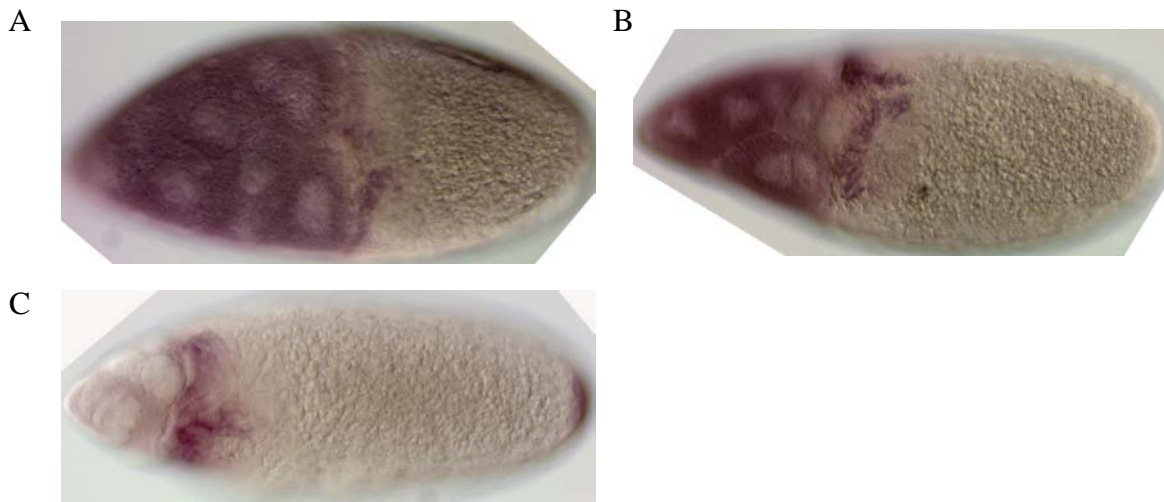

Figure P44. Representative gene expression patterns and annotations for *sgl*. (A) Stage 10B: F. (B) Stage 11: F. (C) Stage 12: M.

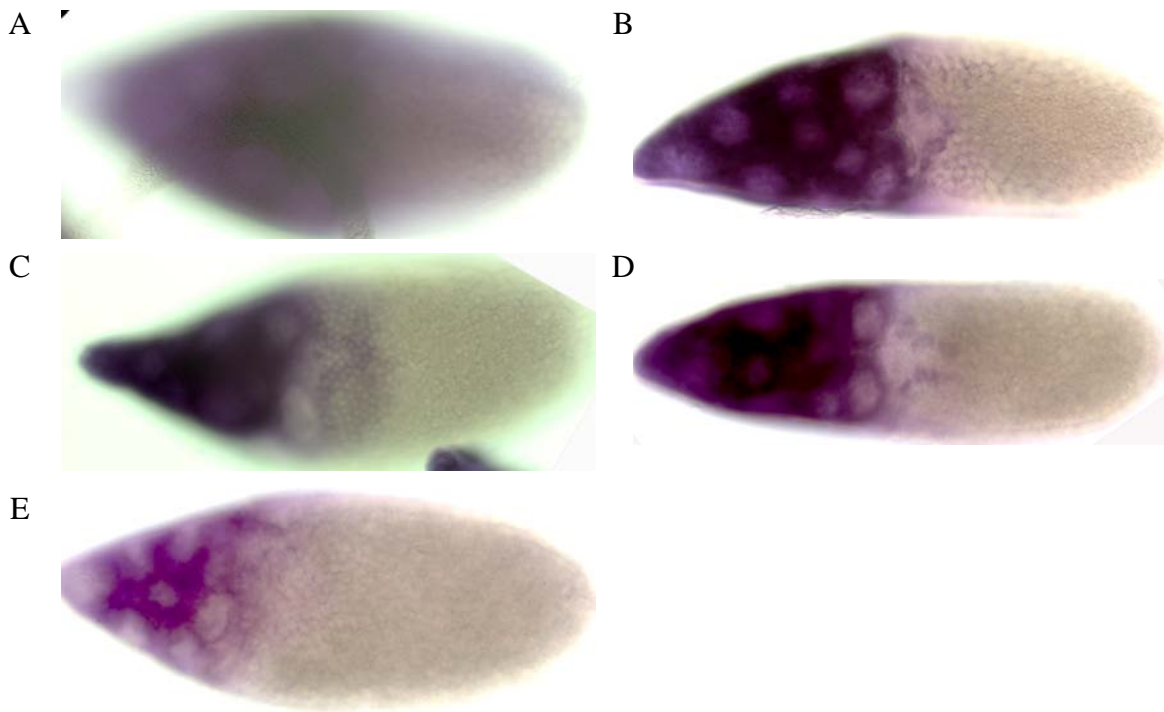

Figure P45. Representative gene expression patterns and annotations for *Shc*. (A) Stage 10A: U. (B) Stage 10B: F. (C) Stage 11: F. (D) Stage 11: F. (E) Stage 12: F.



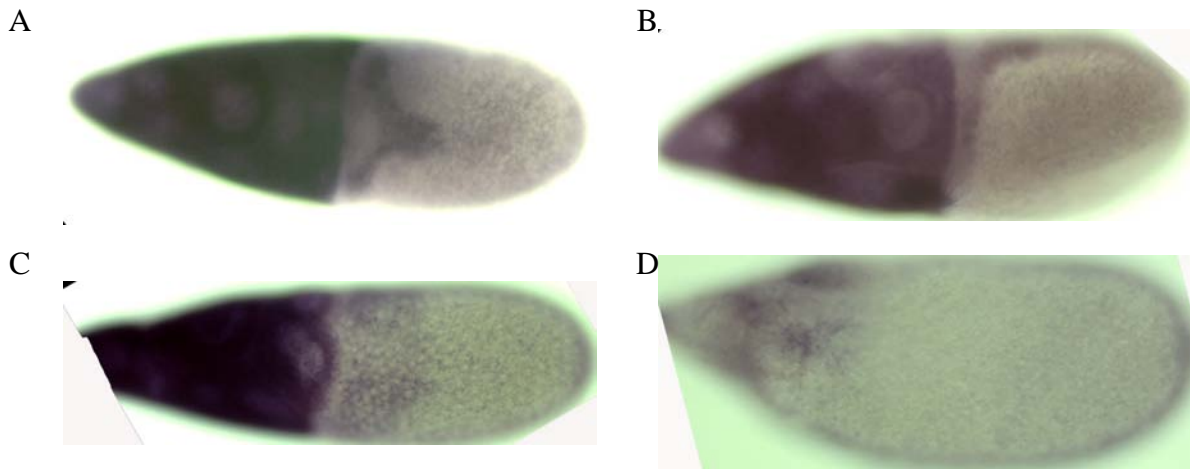

Figure P46. Representative gene expression patterns and annotations for *slbm*. (A) Stage 10B, dorsal view: F. (B) Stage 10B, lateral view: F. (C) Stage 11: R. (D) Stage 12: R.

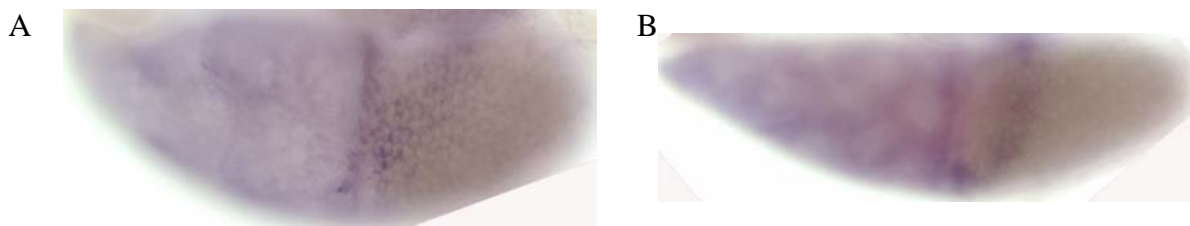

Figure P47. Representative gene expression patterns and annotations for *Snoo*. (A) Stage 10A:  $A \cap D \cup D \setminus D$ . (B) Stage 10B:  $D \setminus D$ .

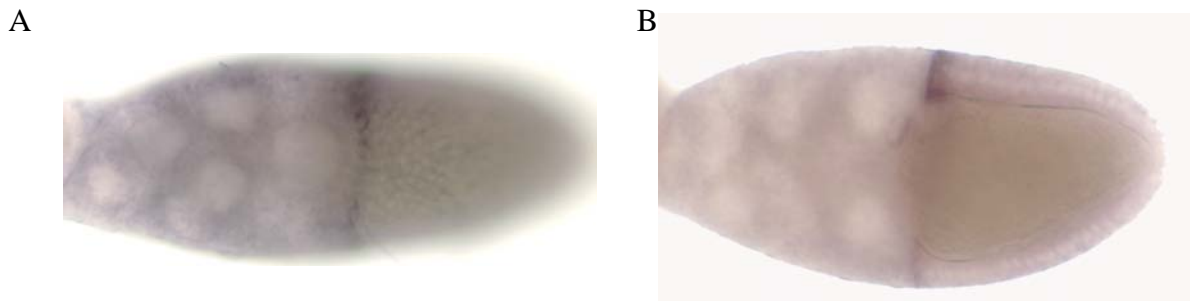

Figure P48. Representative gene expression patterns and annotations for *sog*. (A) Stage 10A:  $A \cap D$ . (B) Stage 10B:  $A \cap D$ .



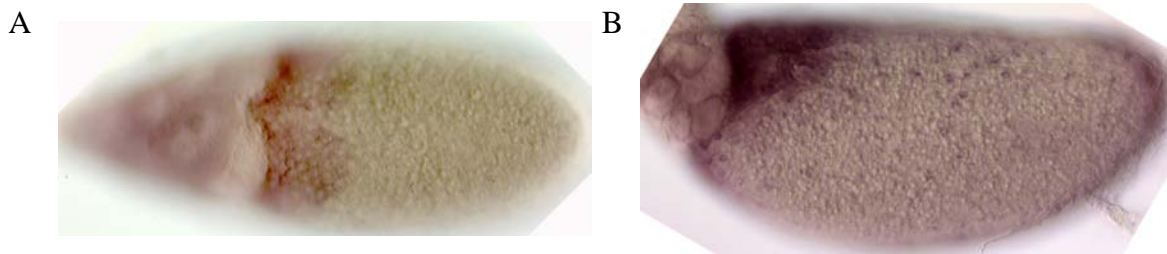

Figure P49. Representative gene expression patterns and annotations for *srp*. (A) Stage 11: D\M. (B) Stage 12: D.

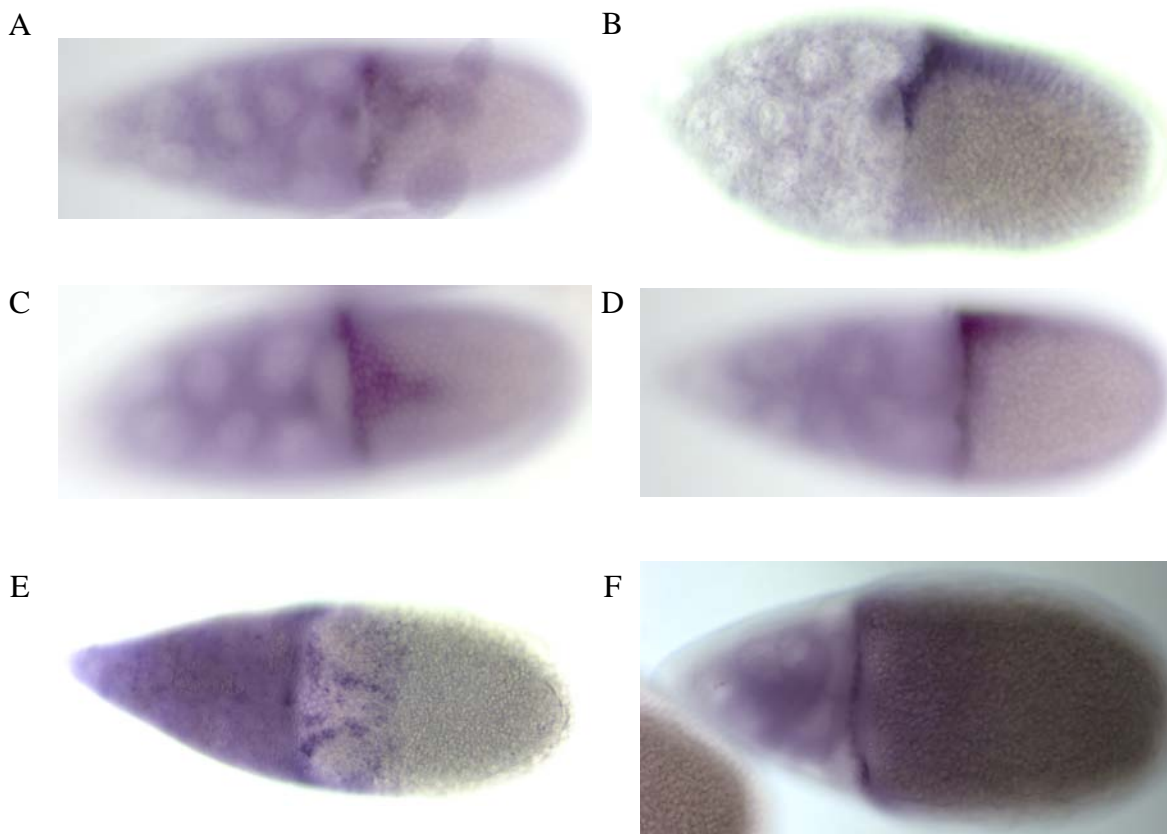

Figure P50. Representative gene expression patterns and annotations for *sty*. (A) Stage 10A, dorsal view, M. (B) Stage 10A, lateral view, M. (C) Stage 10B, dorsal view, A∪M. (D) Stage 10B, lateral view: A∪M. (E) Stage 11, dorsal view: A\D∪F. (F) Stage 11, ventral view: A\D∪F.

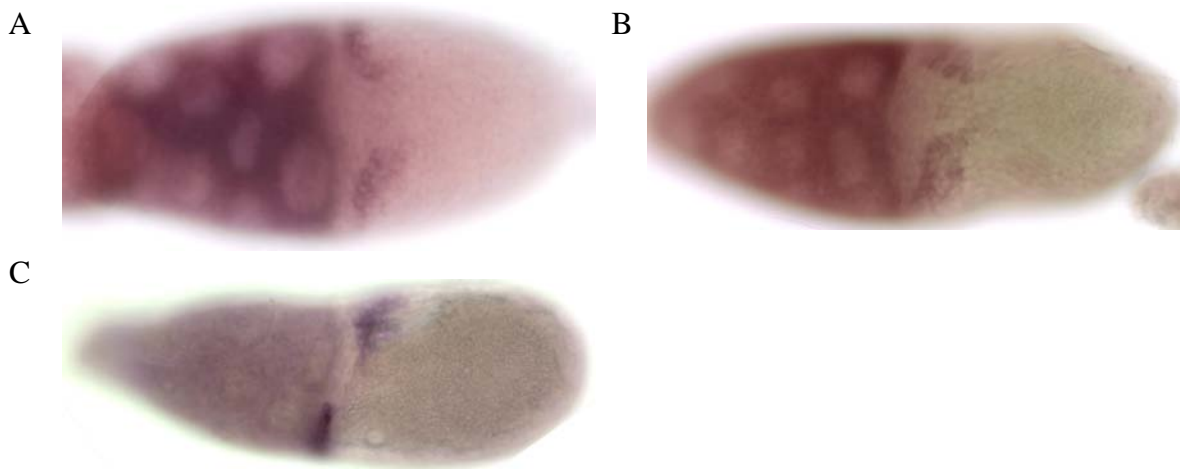

Figure P51. Representative gene expression patterns and annotations for *tkv*. (A) Stage 10A: A\D∪R. (B) Stage 10B, dorsal view: A\D∪R. (C) Stage 10B, lateral view: A\D∪R.

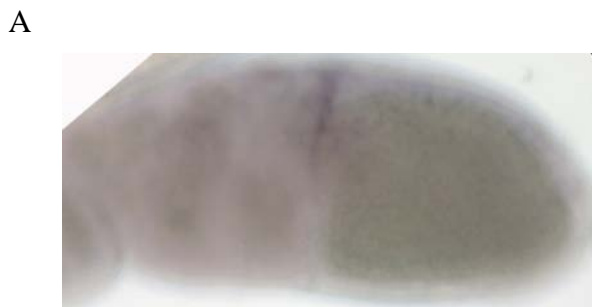

Figure P52. Representative gene expression patterns and annotations for *tsq*. (A) Stage 10B: A∩D.

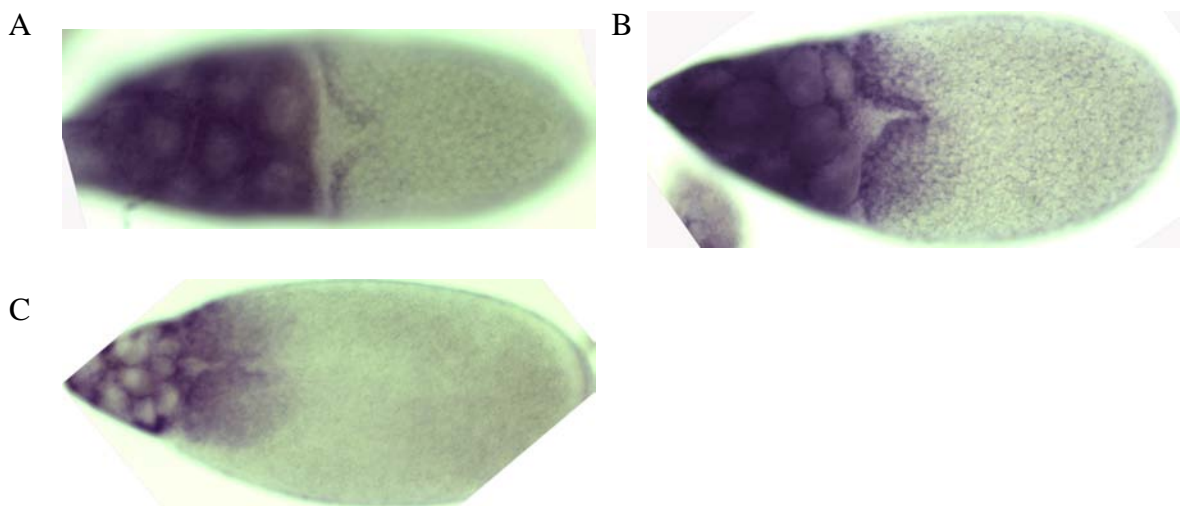

Figure P53. Representative gene expression patterns and annotations for *Vinc*. (A) Stage 10B: F. (B) Stage 11: F∪R. (C) Stage 12: F∪R.

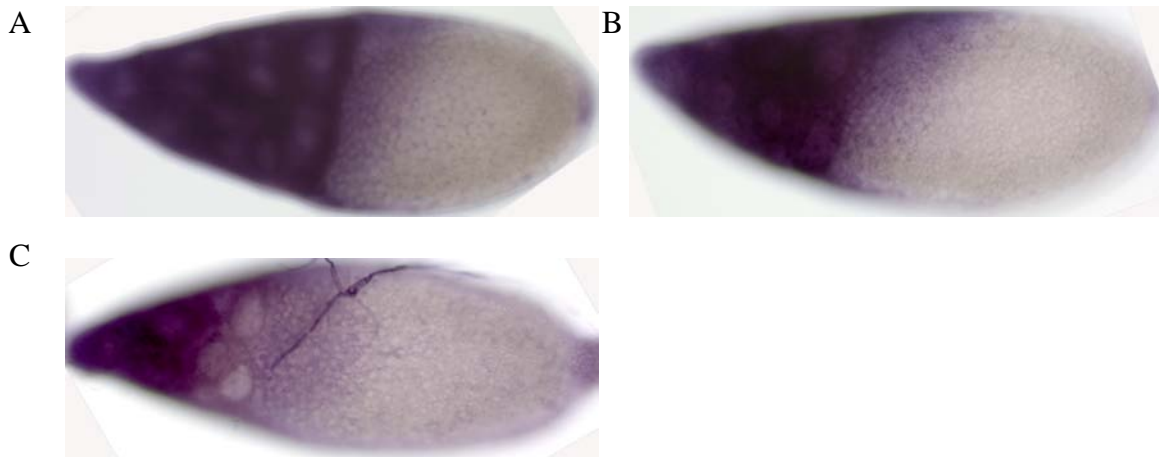

Figure P54. Representative gene expression patterns and annotations for *vkg*. (A) Stage 10B: A. (B) Stage 11: A. (C) Stage 12: D.

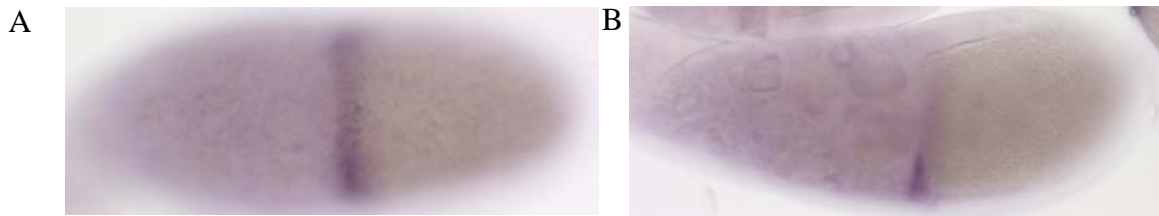

Figure P55. Representative gene expression patterns and annotations for *wit*. (A) Stage 10A: A. (B) Stage 10B: A\D.

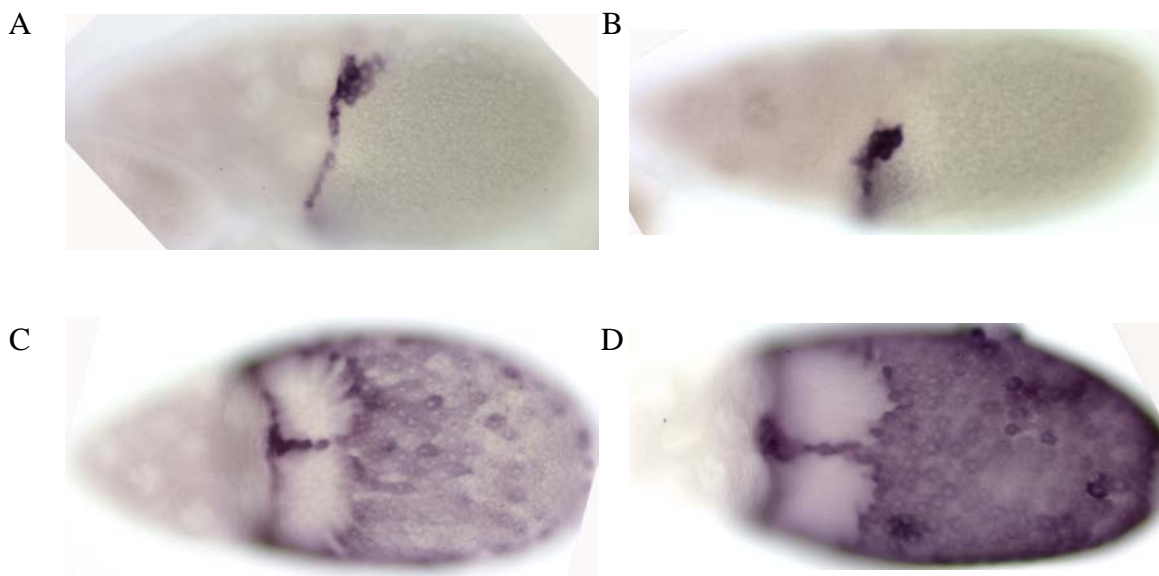

Figure P56. Representative gene expression patterns and annotations for *yellow-g2*. (A) Stage 10B, ventral view: A\D. (B) Stage 10B, lateral view: A\D. (C) Stage 11: M∪U\D. (D) Stage 12: M∪U\D.
